# Supplementary material for: 14-Substituted Diquinothiazines as a New Group of Anticancer Agents
Source: MDPI journal article supplement (doi:10.3390/molecules28073248), 2023-04-05
Supplement: s1 [file s1]

# Supplementary Material

## 14-Substituted Diquinothiazines as a New Group of Anticancer Agents

Małgorzata Jeleń <sup>1,\*</sup>, Krystian Pluta <sup>1</sup>, Małgorzata Szmielew <sup>1</sup>, Beata Morak-Młodawska <sup>1</sup>, Kinga Herman <sup>2</sup>, Klaudia Giercuskiewicz <sup>3</sup>, Anna Kasprzycka <sup>2,4</sup> and Magdalena Skonieczna <sup>3,4,\*</sup>

<sup>1</sup> Department of Organic Chemistry, Faculty of Pharmaceutical Sciences in Sosnowiec, The Medical University of Silesia, Jagiellońska 4, 41-200 Sosnowiec, Poland; bmlodawska@sum.edu.pl (B.M.-M.)

<sup>2</sup> Department of Organic Chemistry, Bioorganic Chemistry and Biotechnology, Faculty of Chemistry, Silesian University of Technology, Krzywoustego Street 4, 44-100 Gliwice, Poland; kingher651@student.polsl.pl (K.H.); anna.kasprzycka@polsl.pl (A.K.)

<sup>3</sup> Department of Systems Biology and Engineering, The Silesian University of Technology, Akademicka Street 16, 44-100 Gliwice, Poland; klaudia.giercuskiewicz@polsl.pl

<sup>4</sup> Centre of Biotechnology, Silesian University of Technology, Krzywoustego Street 8, 44-100 Gliwice, Poland

\* Correspondence: manowak@sum.edu.pl (M.J.); magdalena.skonieczna@polsl.pl (M.S.); Tel.: +48-32-364-16-04 (M.J.); +48-32-237-11-68 (M.S.)

### Content

1

1. **Figure S1.** Survival fraction of HCT116 (left) and SH-5YSY (right) cell lines after 72 h of incubation with tested compounds and positive controls, anticancer drug - etoposide evaluated by MTT assay. Results presented as mean form 3 experiments, +/- SD. Statistical significance indicated by star; evaluated by T-test, where  $p < 0.05$  (TRUE bolded under the charts).

2

2. **Figure S2.** Typical histograms of cell cycle distribution in control and treated HCT116 cells after 72 h of incubation with tested compounds, at dose of 100  $\mu$ M. DNA gating during cytometry analyses after iodine propide staining (PI; 100  $\mu$ g/ml; [a.u.]) showed the cells in cell cycle phases: sub G1; G0/G1; S and G2/M, respectively.

9

3. Spectra of compounds 2-6.

10

**Figure S1.** Survival fraction of HCT116 (left) and SH-SY5Y (right) cell lines after 72 h of incubation with tested compounds and positive controls, anticancer drug-etoposide, respectively, evaluated by MTT assay. Results presented as mean form 3 experiments, +/- SD. Statistical significance indicated by star; evaluated by T-test, where  $p < 0.05$  (TRUE bolded under the charts).

## M0

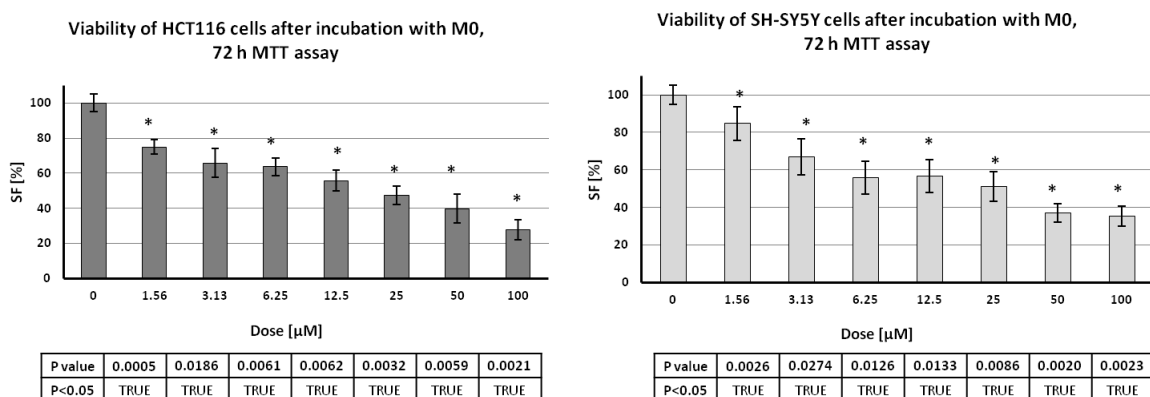

## 2a

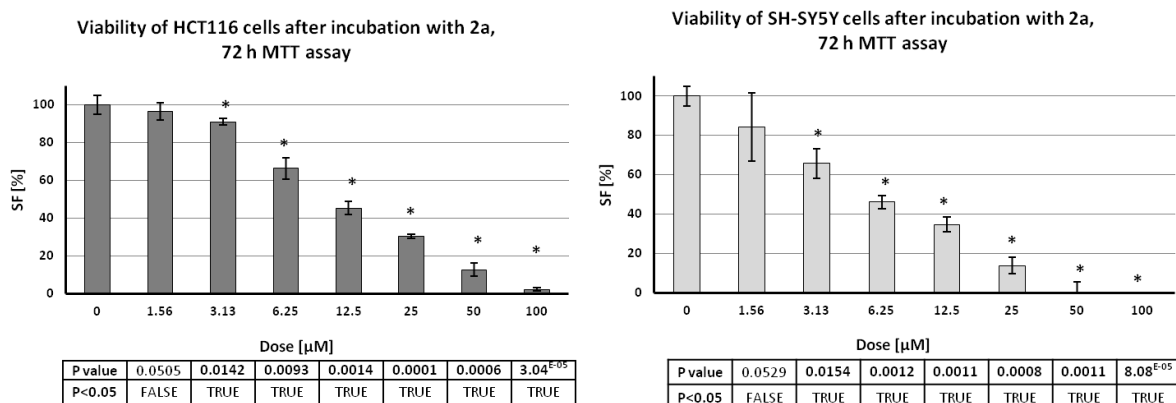

## 2b

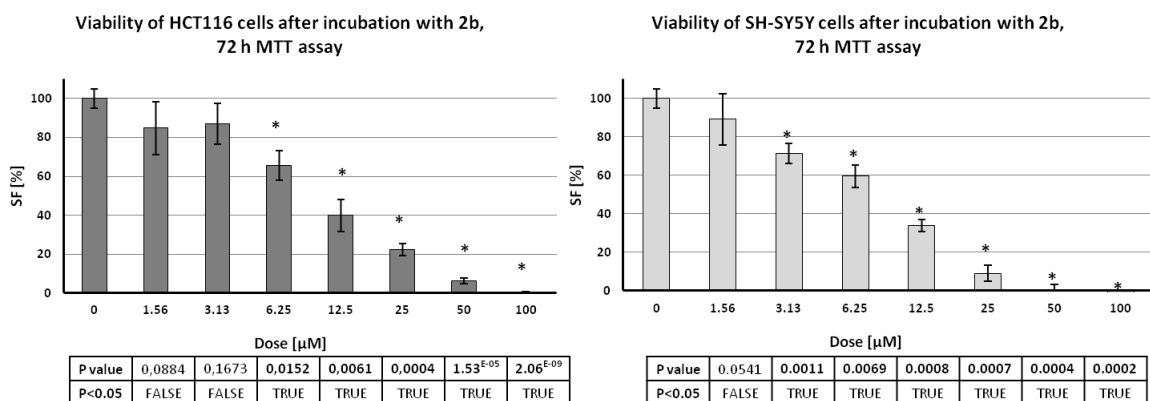

**2c**

Viability of HCT116 cells after incubation with 2c,  
72 h MTT assay

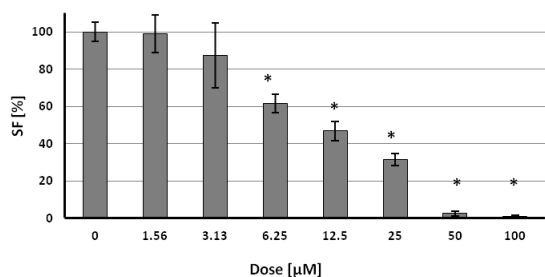

|         |        |        |        |        |        |          |        |
|---------|--------|--------|--------|--------|--------|----------|--------|
| P value | 0.3356 | 0.2315 | 0.0007 | 0.0029 | 0.0051 | 4.65E-06 | 0.0032 |
| P<0.05  | FALSE  | FALSE  | TRUE   | TRUE   | TRUE   | TRUE     | TRUE   |

Viability of SH-SY5Y cells after incubation with 2c,  
72 h MTT assay

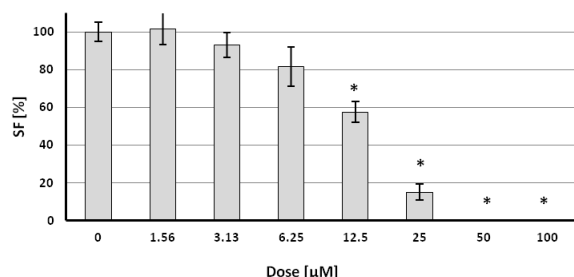

|         |        |        |        |        |        |        |          |
|---------|--------|--------|--------|--------|--------|--------|----------|
| P value | 0.0511 | 0.2196 | 0.0929 | 0.0055 | 0.0008 | 0.0001 | 4.72E-05 |
| P<0.05  | FALSE  | FALSE  | FALSE  | TRUE   | TRUE   | TRUE   | TRUE     |

**2d**

Viability of HCT116 cells after incubation with 2d,  
72 h MTT assay

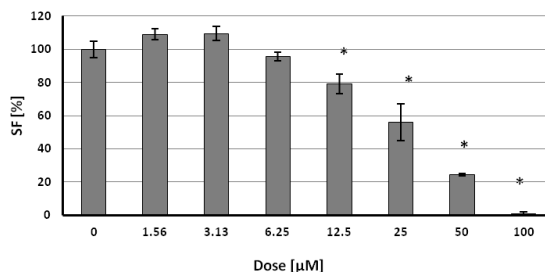

|         |        |        |        |        |        |          |          |
|---------|--------|--------|--------|--------|--------|----------|----------|
| P value | 0.1146 | 0.5698 | 0.7935 | 0.0261 | 0.0205 | 6.51E-06 | 1.55E-05 |
| P<0.05  | FALSE  | FALSE  | FALSE  | TRUE   | TRUE   | TRUE     | TRUE     |

Viability of SH-SY5Y cells after incubation with 2d,  
72 h MTT assay

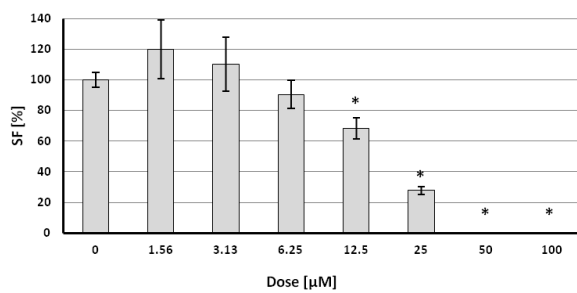

|         |        |        |        |        |        |        |        |
|---------|--------|--------|--------|--------|--------|--------|--------|
| P value | 0.0071 | 0.4226 | 0.2096 | 0.0149 | 0.0005 | 0.0002 | 0.0002 |
| P<0.05  | FALSE  | FALSE  | FALSE  | TRUE   | TRUE   | TRUE   | TRUE   |

**2e**

Viability of HCT116 cells after incubation with 2e,  
72 h MTT assay

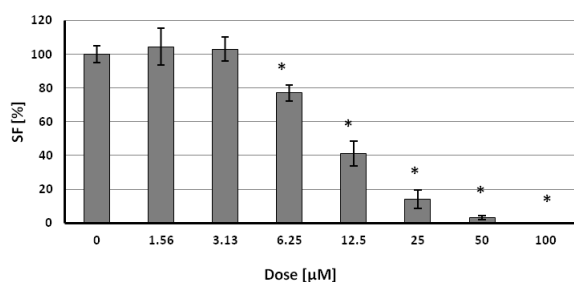

|         |        |        |        |        |        |        |        |
|---------|--------|--------|--------|--------|--------|--------|--------|
| P value | 0.0507 | 0.5505 | 0.0013 | 0.0051 | 0.0139 | 0.0248 | 0.0035 |
| P<0.05  | FALSE  | FALSE  | TRUE   | TRUE   | TRUE   | TRUE   | TRUE   |

Viability of SH-SY5Y cells after incubation with 2e,  
72 h MTT assay

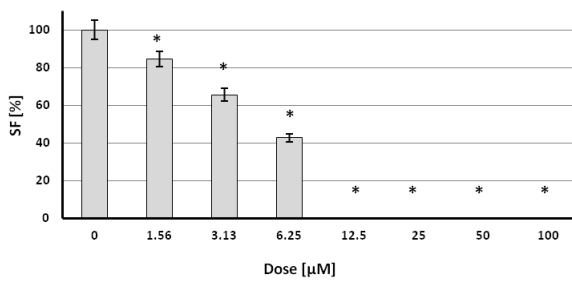

|         |          |          |          |          |          |          |          |
|---------|----------|----------|----------|----------|----------|----------|----------|
| P value | 4.73E-09 | 2.44E-08 | 1.75E-07 | 3.53E-08 | 6.31E-08 | 6.77E-08 | 6.55E-08 |
| P<0.05  | TRUE     |

**2f**

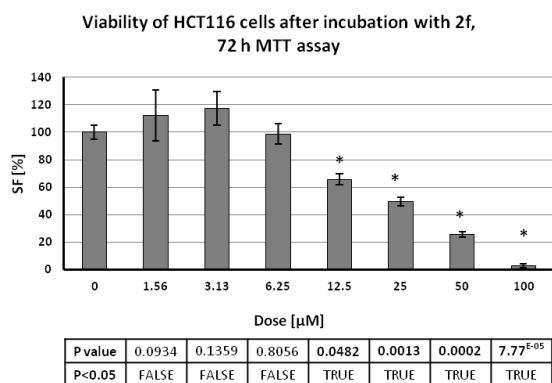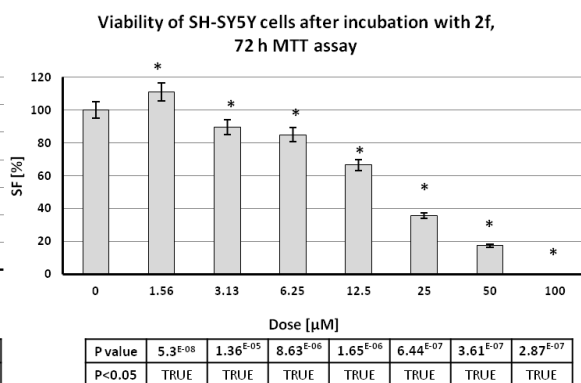

**2g**

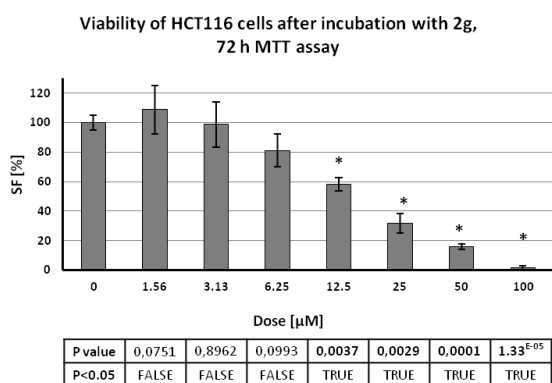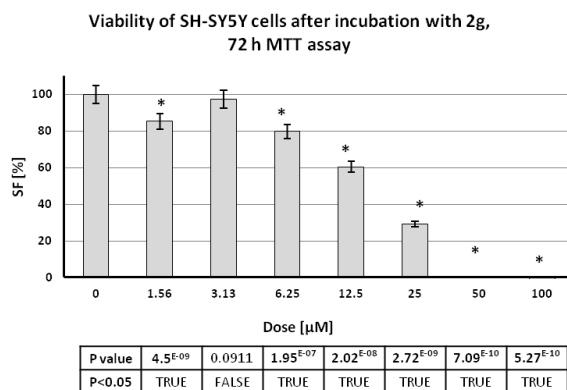

**3a**

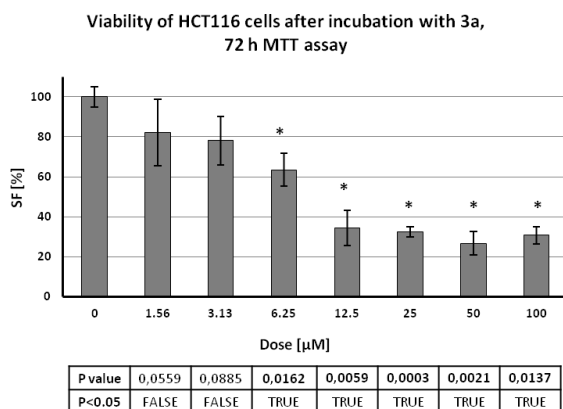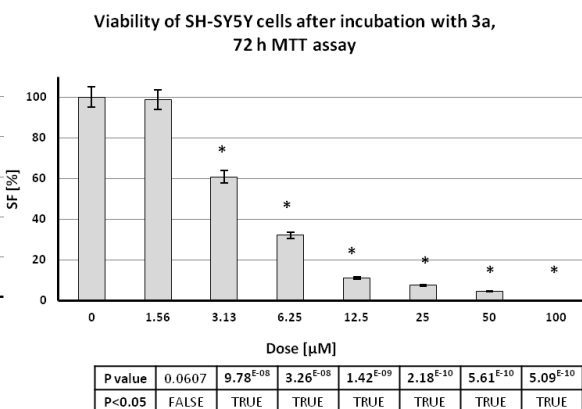

**3b**

Viability of HCT116 cells after incubation with 3b,  
72 h MTT assay

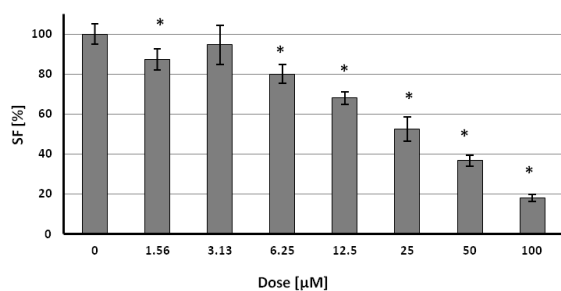

|        |        |        |        |        |        |        |        |
|--------|--------|--------|--------|--------|--------|--------|--------|
| Pvalue | 0.0007 | 0.4456 | 0.0187 | 0.0032 | 0.0056 | 0.0006 | 0.0002 |
| P<0.05 | TRUE   | FALSE  | TRUE   | TRUE   | TRUE   | TRUE   | TRUE   |

Viability of SH-SY5Y cells after incubation with 3b,  
72 h MTT assay

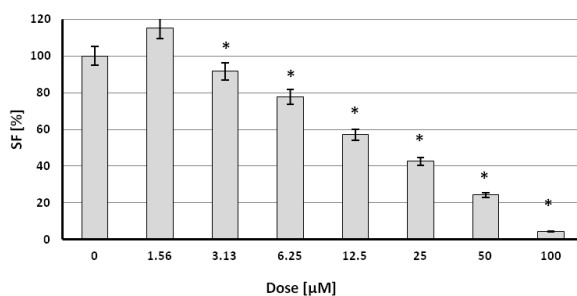

|        |        |         |         |          |          |          |          |
|--------|--------|---------|---------|----------|----------|----------|----------|
| Pvalue | 0.0638 | 2.6E-06 | 6.7E-07 | 1.02E-07 | 1.16E-08 | 3.41E-09 | 1.83E-10 |
| P<0.05 | FALSE  | TRUE    | TRUE    | TRUE     | TRUE     | TRUE     | TRUE     |

### 3c

Viability of HCT116 cells after incubation with 3c,  
72 h MTT assay

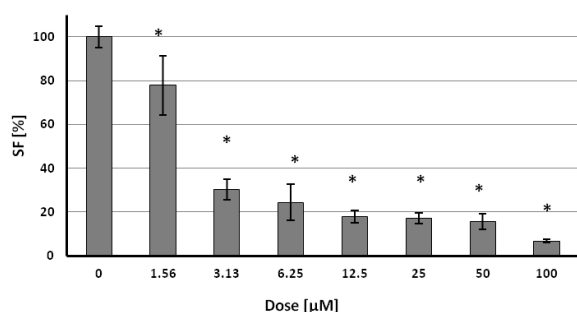

|        |        |        |        |        |        |        |         |
|--------|--------|--------|--------|--------|--------|--------|---------|
| Pvalue | 0.0115 | 0.0015 | 0.0041 | 0.0004 | 0.0003 | 0.0006 | 2.6E-05 |
| P<0.05 | TRUE    |

Viability of SH-SY5Y cells after incubation with 3c,  
72 h MTT assay

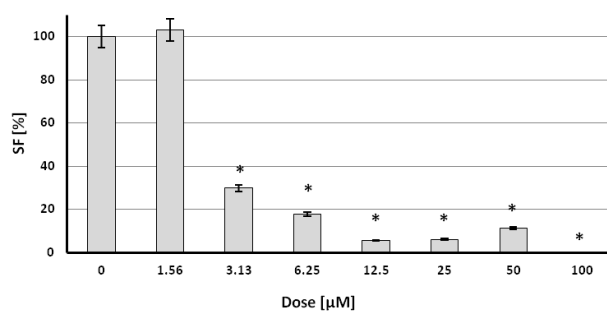

|        |        |          |          |          |          |          |          |
|--------|--------|----------|----------|----------|----------|----------|----------|
| Pvalue | 0.0417 | 3.67E-09 | 9.15E-09 | 6.36E-10 | 1.41E-09 | 3.35E-09 | 5.45E-10 |
| P<0.05 | FALSE  | TRUE     | TRUE     | TRUE     | TRUE     | TRUE     | TRUE     |

### 5a

Viability of HCT116 cells after incubation with 5a,  
72 h MTT assay

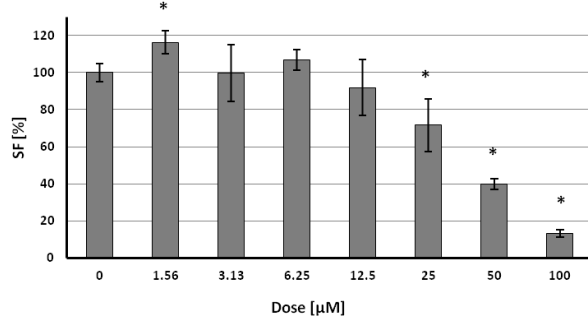

|        |        |        |        |        |        |        |        |
|--------|--------|--------|--------|--------|--------|--------|--------|
| Pvalue | 0.0005 | 0.9881 | 0.1627 | 0.4481 | 0.0444 | 0.0007 | 0.0002 |
| P<0.05 | TRUE   | FALSE  | FALSE  | FALSE  | TRUE   | TRUE   | TRUE   |

Viability of SH-SY5Y cells after incubation with 5a,  
72 h MTT assay

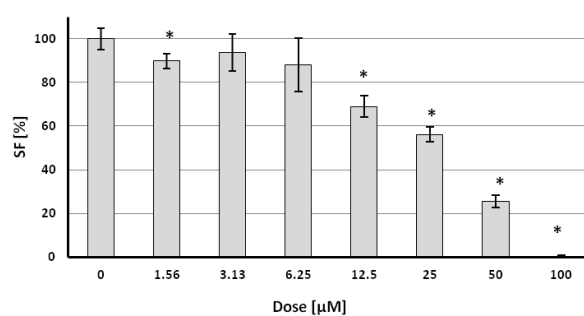

|        |          |        |        |        |        |        |        |
|--------|----------|--------|--------|--------|--------|--------|--------|
| Pvalue | 4.58E-06 | 0.3311 | 0.2369 | 0.0081 | 0.0019 | 0.0005 | 0.0003 |
| P<0.05 | TRUE     | FALSE  | FALSE  | TRUE   | TRUE   | TRUE   | TRUE   |

### 5b

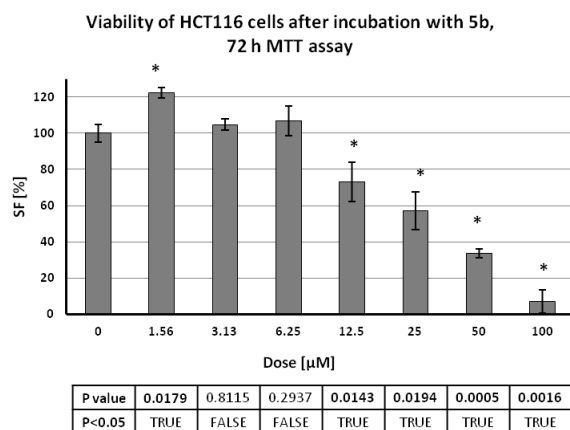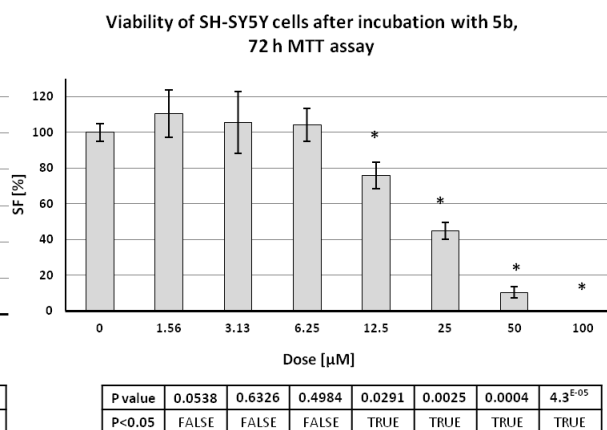

**5c**

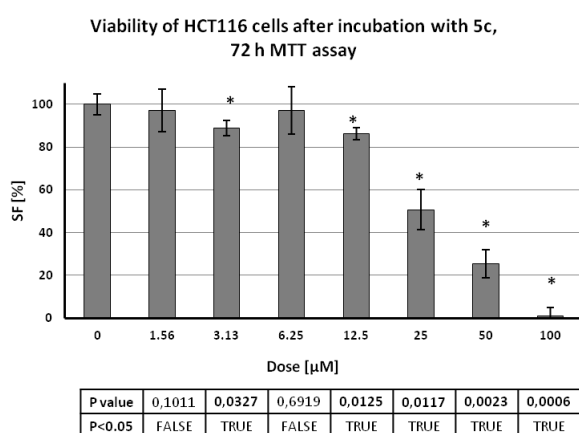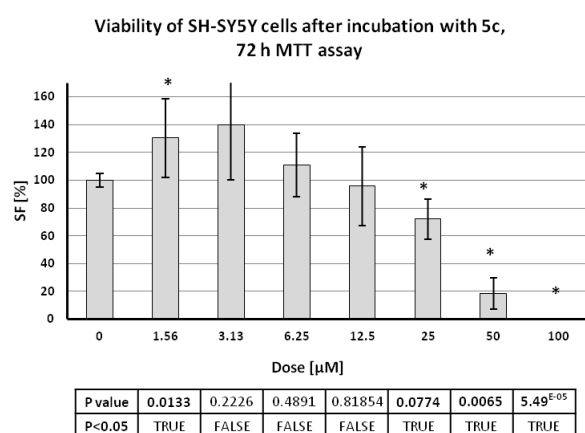

**6a**

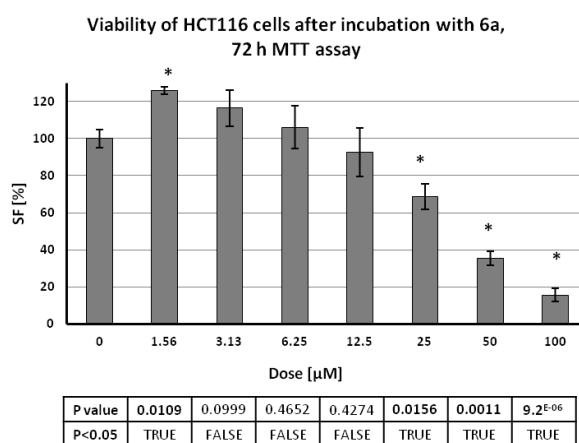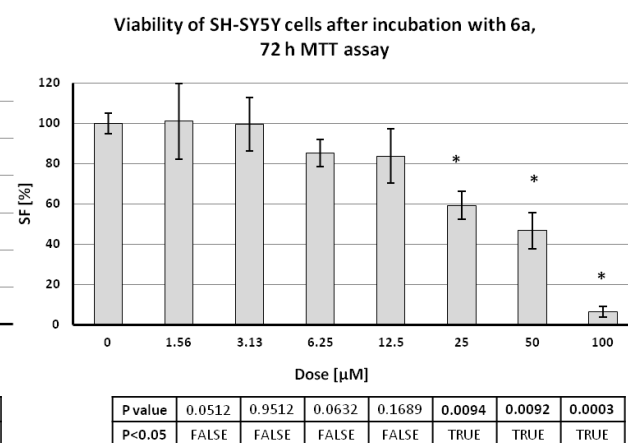

**6b**

Viability of HCT116 cells after incubation with 6b,  
72 h MTT assay

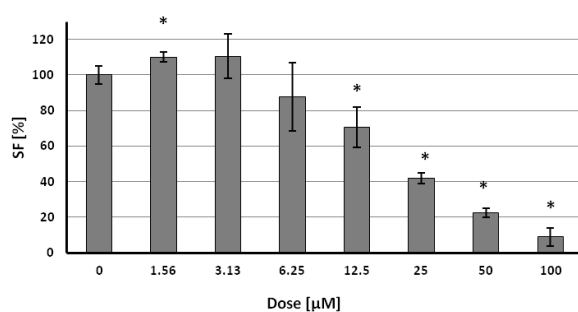

|         |       |        |        |        |        |        |        |
|---------|-------|--------|--------|--------|--------|--------|--------|
| P value | 0.019 | 0.6445 | 0.3781 | 0.0457 | 0.0009 | 0.0003 | 0.0011 |
| P<0.05  | TRUE  | FALSE  | FALSE  | TRUE   | TRUE   | TRUE   | TRUE   |

Viability of SH-SY5Y cells after incubation with 6b,  
72 h MTT assay

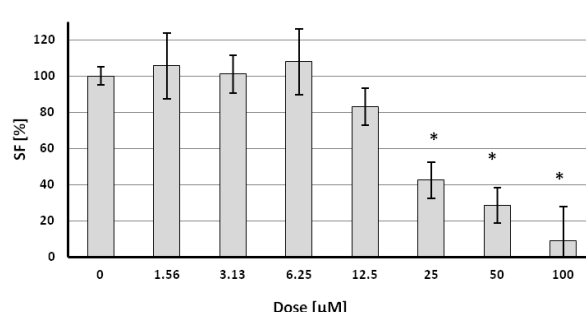

|         |        |        |        |        |        |        |        |
|---------|--------|--------|--------|--------|--------|--------|--------|
| P value | 0.0531 | 0.8693 | 0.5284 | 0.1019 | 0.0099 | 0.0061 | 0.0136 |
| P<0.05  | FALSE  | FALSE  | FALSE  | FALSE  | TRUE   | TRUE   | TRUE   |

## 6c

Viability of HCT116 cells after incubation with 6c,  
72 h MTT assay

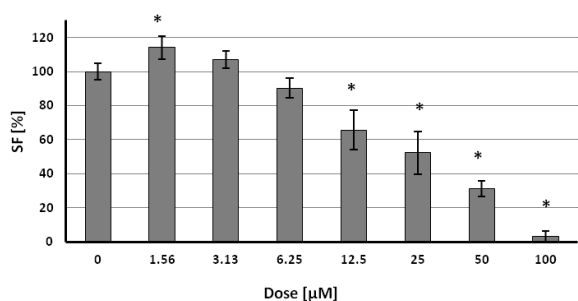

|         |        |        |        |        |        |        |        |
|---------|--------|--------|--------|--------|--------|--------|--------|
| P value | 0.0002 | 0.1305 | 0.1067 | 0.0363 | 0.0228 | 0.0015 | 0.0003 |
| P<0.05  | TRUE   | FALSE  | FALSE  | TRUE   | TRUE   | TRUE   | TRUE   |

Viability of SH-SY5Y cells after incubation with 6c,  
72 h MTT assay

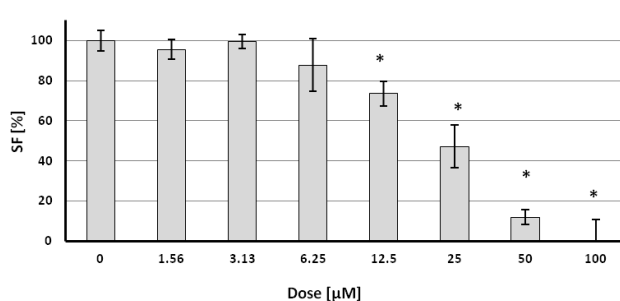

|         |        |        |        |        |        |        |        |
|---------|--------|--------|--------|--------|--------|--------|--------|
| P value | 0.0016 | 0.8235 | 0.2452 | 0.0178 | 0.0133 | 0.0006 | 0.0044 |
| P<0.05  | FALSE  | FALSE  | FALSE  | TRUE   | TRUE   | TRUE   | TRUE   |

## Etoposide

Viability of HCT116 cells after incubation with  
etoposide, 72 h MTT assay

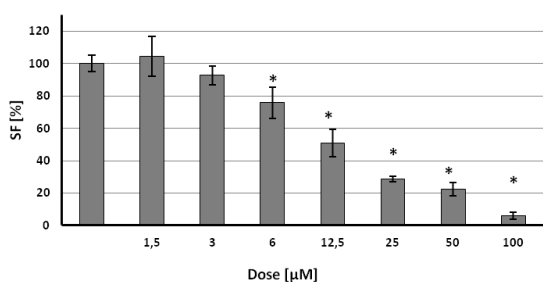

|         |        |        |        |        |        |        |        |
|---------|--------|--------|--------|--------|--------|--------|--------|
| P value | 0.1556 | 0.8089 | 0.0107 | 0.0316 | 0.0272 | 0.0471 | 0.0478 |
| P<0.05  | FALSE  | FALSE  | TRUE   | TRUE   | TRUE   | TRUE   | TRUE   |

Viability of SH-SY5Y cells after incubation with  
Etoposide, 72 h MTT assay

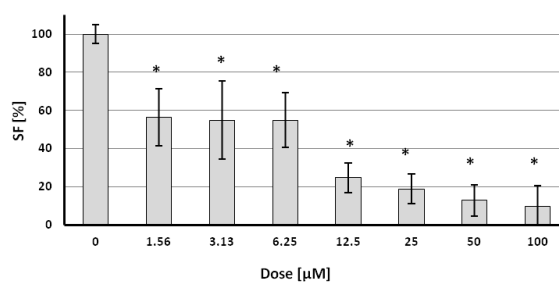

|         |        |        |        |        |        |        |        |
|---------|--------|--------|--------|--------|--------|--------|--------|
| P value | 0.0149 | 0.0427 | 0.0321 | 0.0047 | 0.0031 | 0.0031 | 0.0049 |
| P<0.05  | TRUE   |

**Figure S2.** Typical histograms of cell cycle distribution in control and treated HCT116 cells after 72 h of incubation with tested compounds, at dose of 100  $\mu$ M. DNA gating during cytometry analyses after iodium propide staining (PI; 100  $\mu$ g/ml; [a.u.]) showed the cells in cell cycle phases: subG1; G0/G1; S and G2/M, respectively.

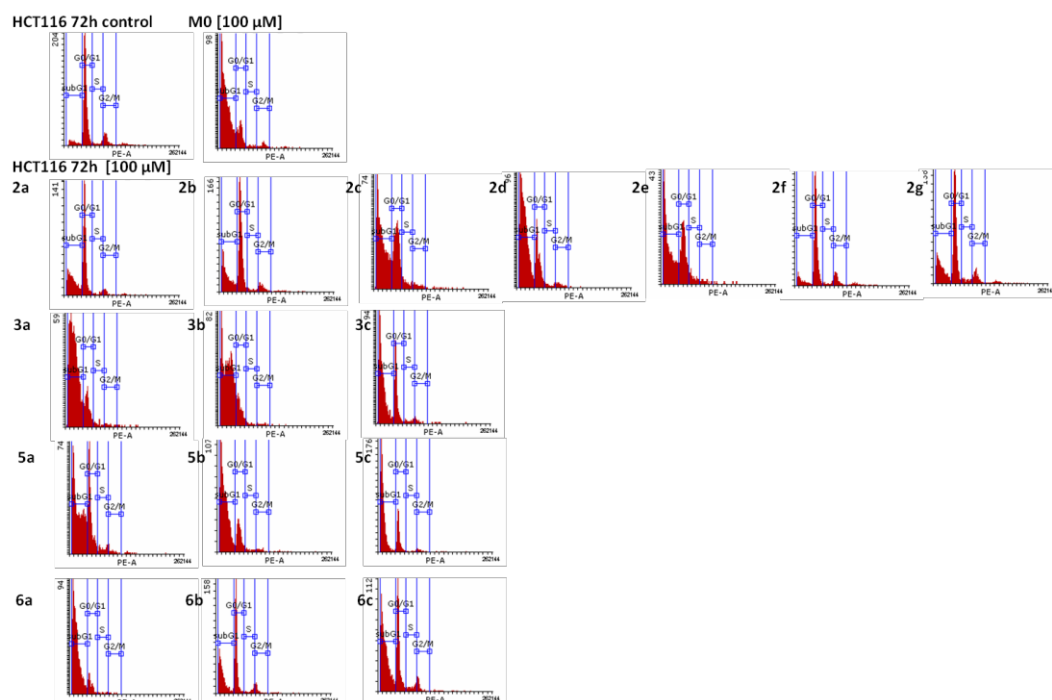

**Figure S3.** Typical histograms of cell cycle distribution in control and treated SH-5YSY cells after 72 h of incubation with tested compounds, at dose of 100  $\mu$ M. DNA gating during cytometry analyses after iodium propide staining (PI; 100  $\mu$ g/ml; [a.u.]) showed the cells in cell cycle phases: subG1; G0/G1; S and G2/M, respectively.

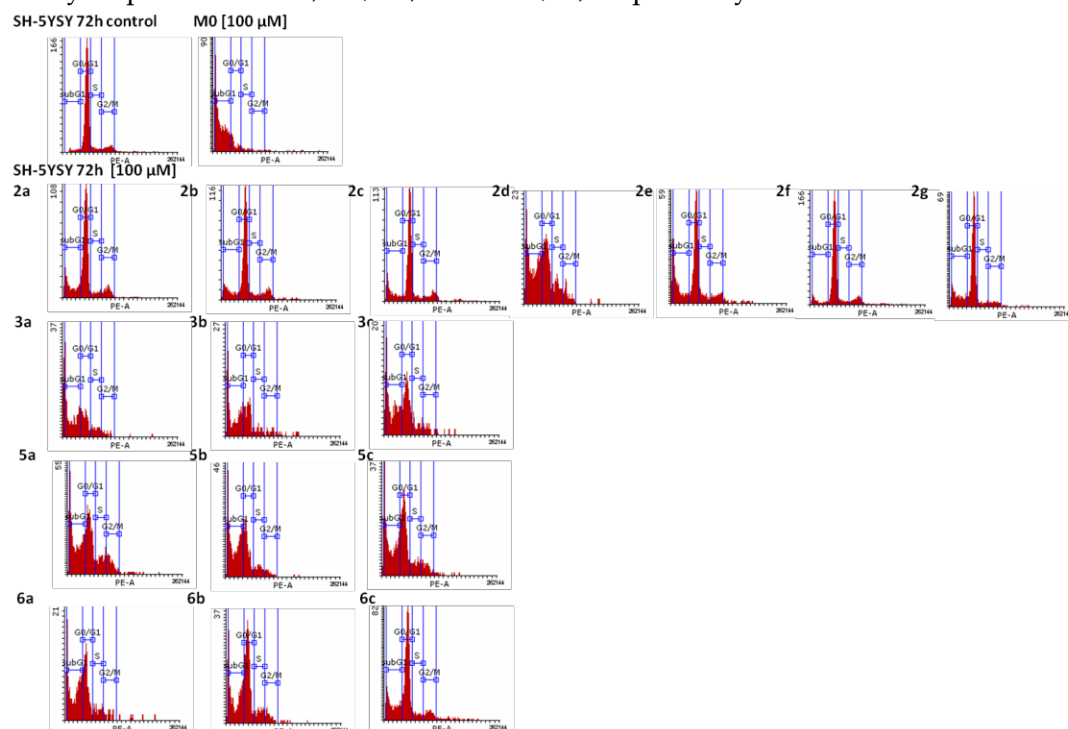



## Spectra of compounds 2-6.

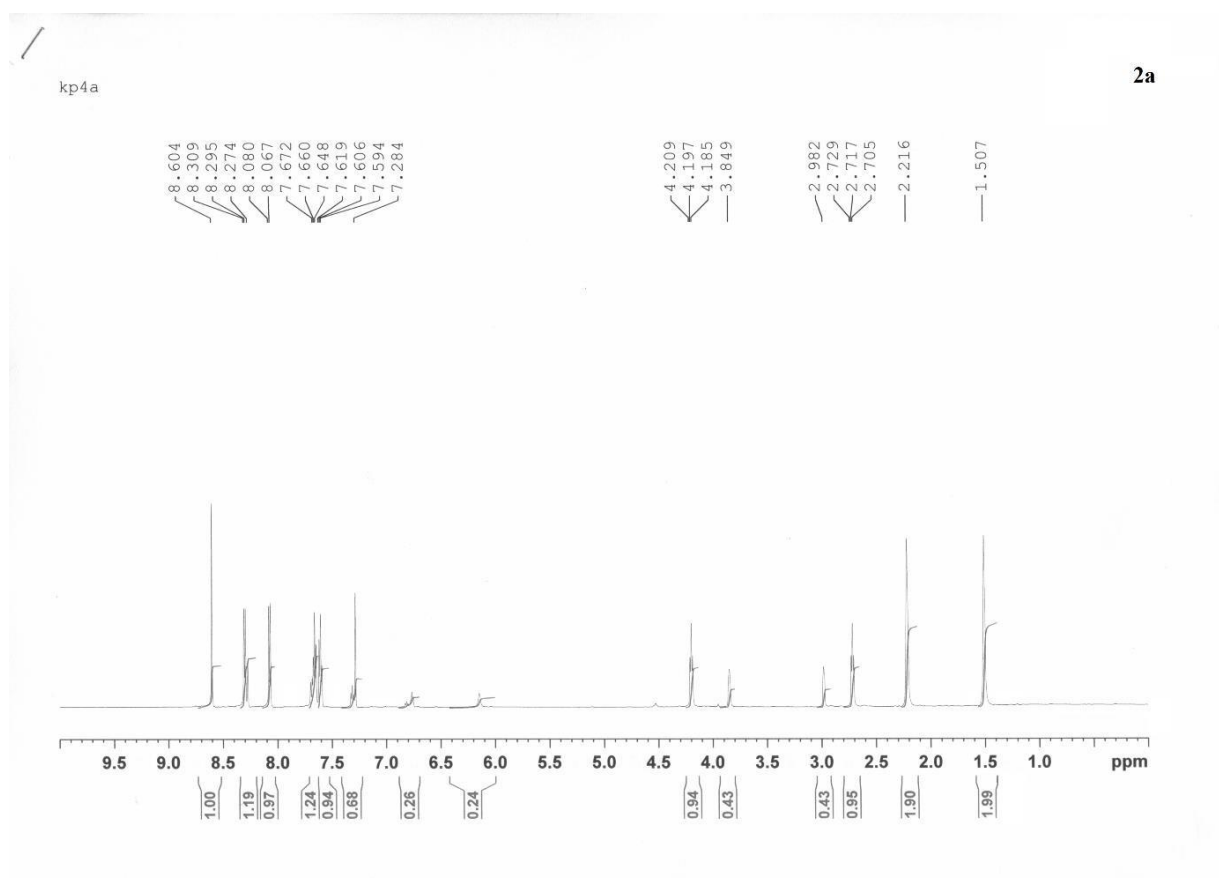

$^1\text{H}$  NMR of 14-(pyrrolidinyethyl)diquinothiazine (**2a**)

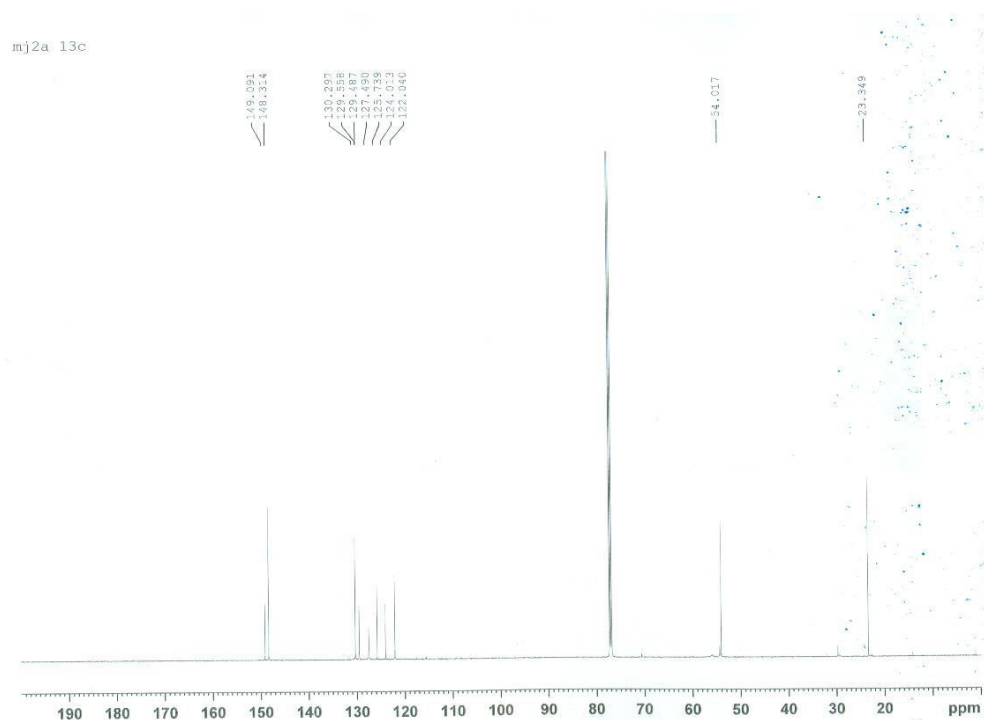

$^{13}\text{C}$  NMR of 14-(pyrrolidinyethyl)diquinothiazine (**2a**)

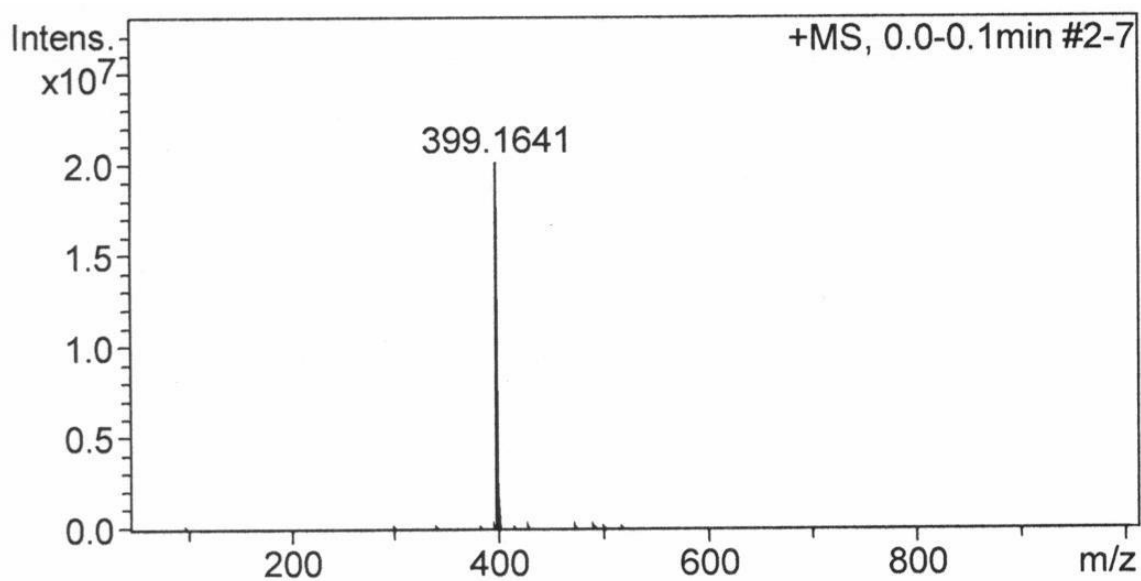

| # | m/z      | Res.  | S/N      | I        | I %   | FWHM   |
|---|----------|-------|----------|----------|-------|--------|
| 1 | 399.1641 | 14893 | 230314.8 | 20151970 | 100.0 | 0.0268 |

HR MS of 14-(pyrrolidinylolethyl)diquinethiazine (**2a**) (calcd m/z = 399.1643)

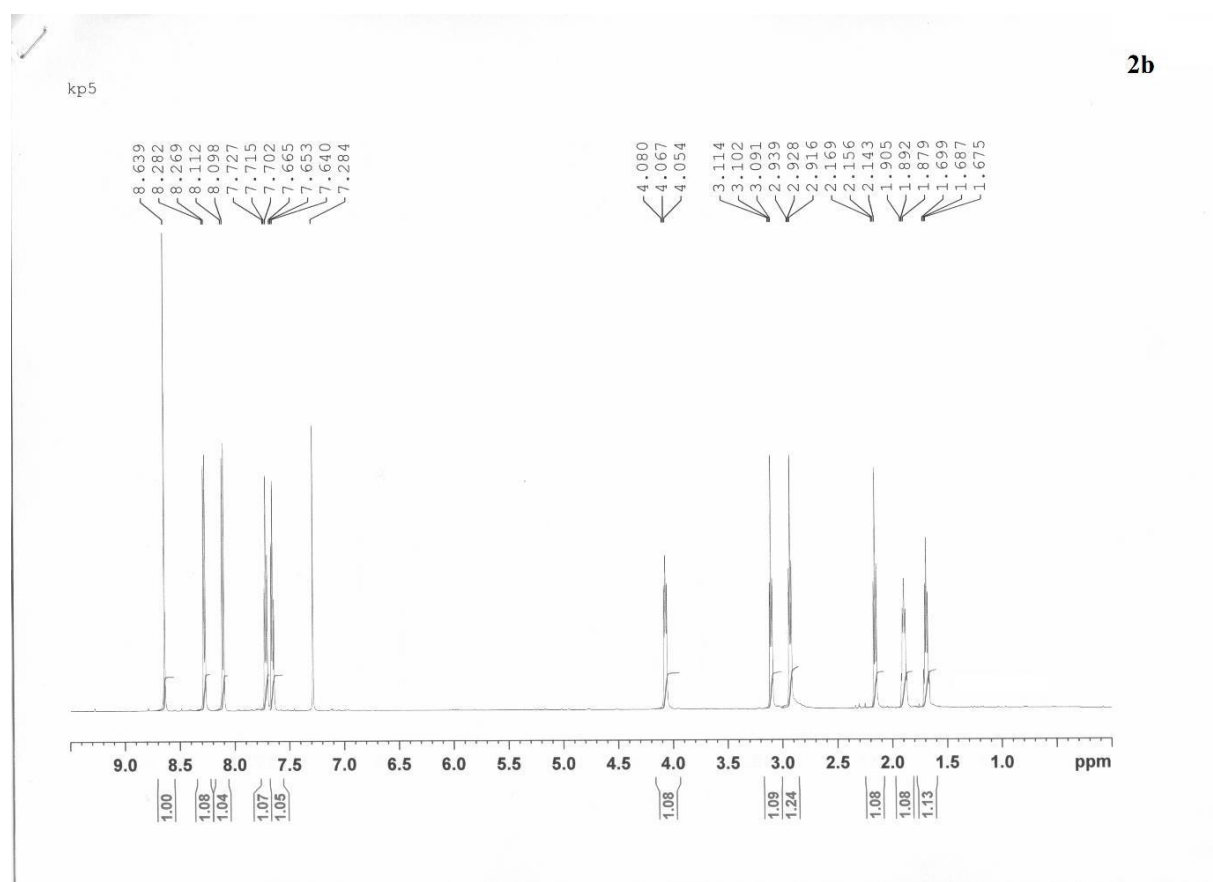

<sup>1</sup>H NMR of 14-(pyrrolidinonylpropyl)diquinethiazine (**2b**)

mj2b 13c

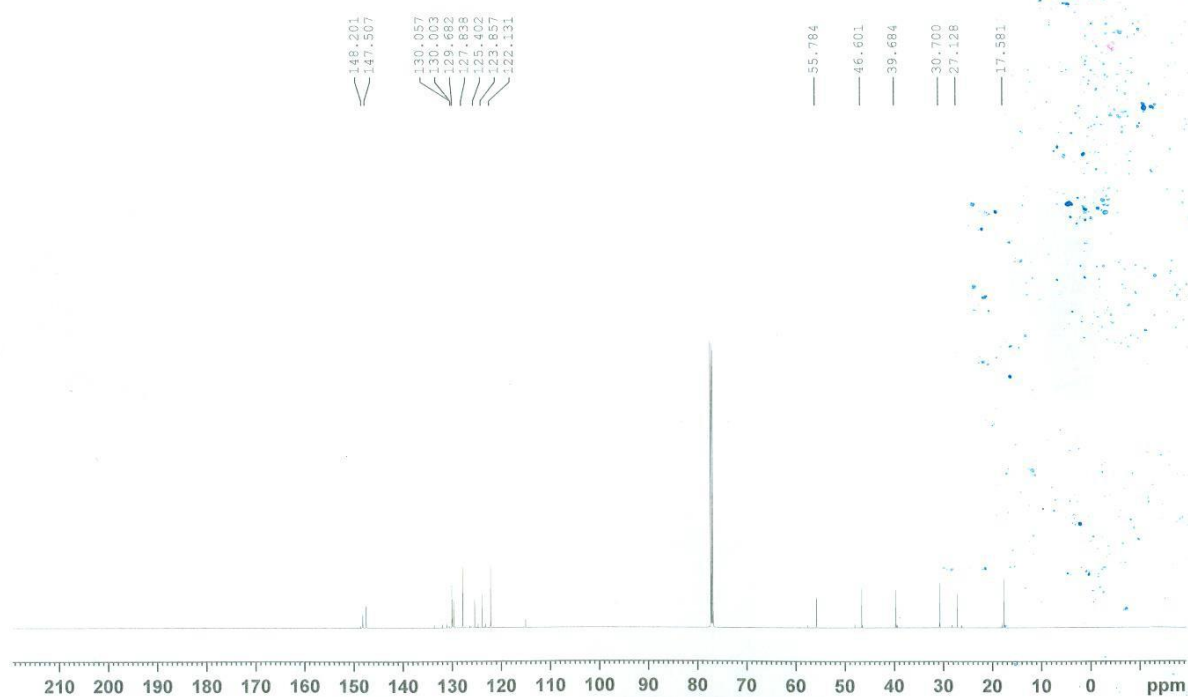

$^{13}\text{C}$  NMR of 14-(pyrrolidinonylpropyl)diquinethiazine (**2b**)

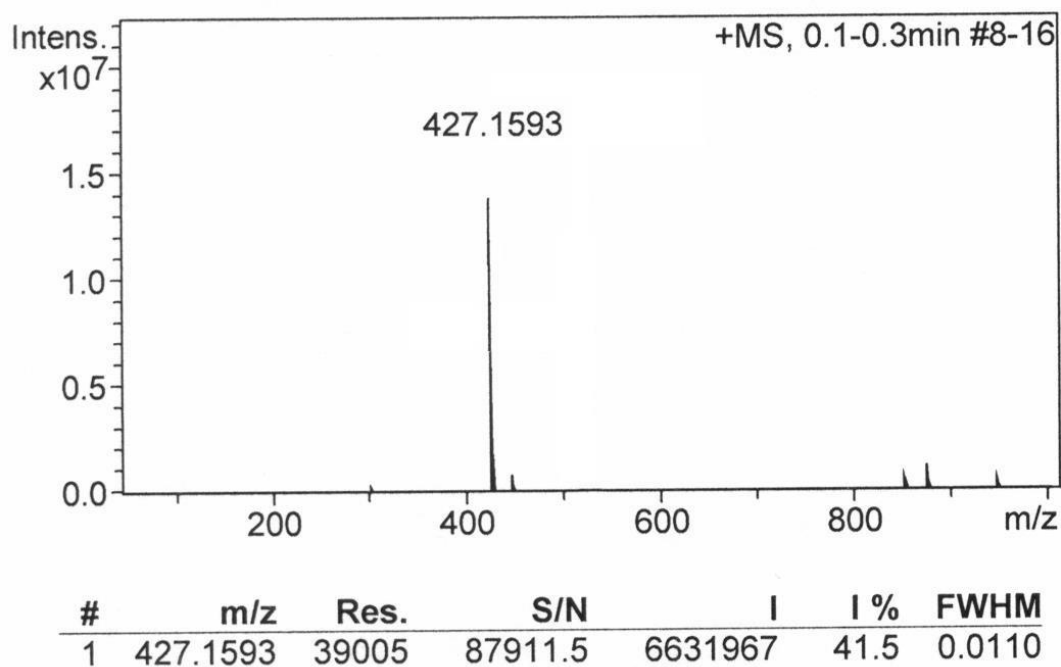

HR MS of 14-(pyrrolidinonylpropyl)diquinethiazine (**2b**) (calcd m/z = 427.1593)

KP 2

2c

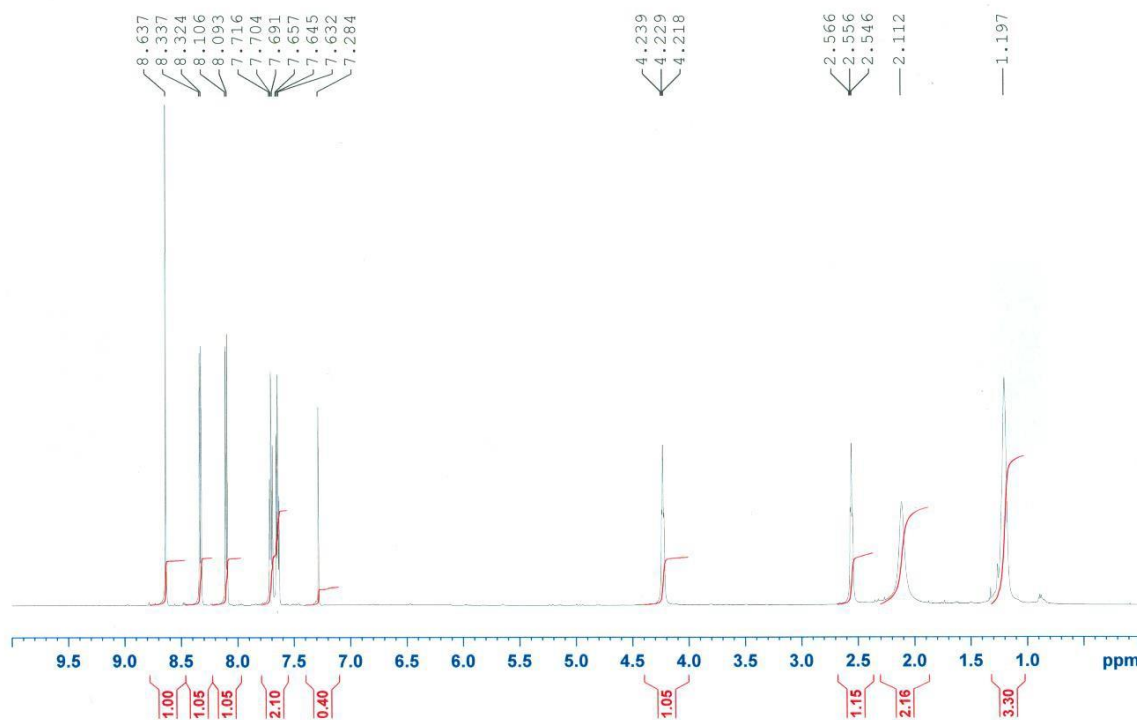

<sup>1</sup>H NMR of 14-(piperidinyethyl)diquinethiazine (2c)

mj2c

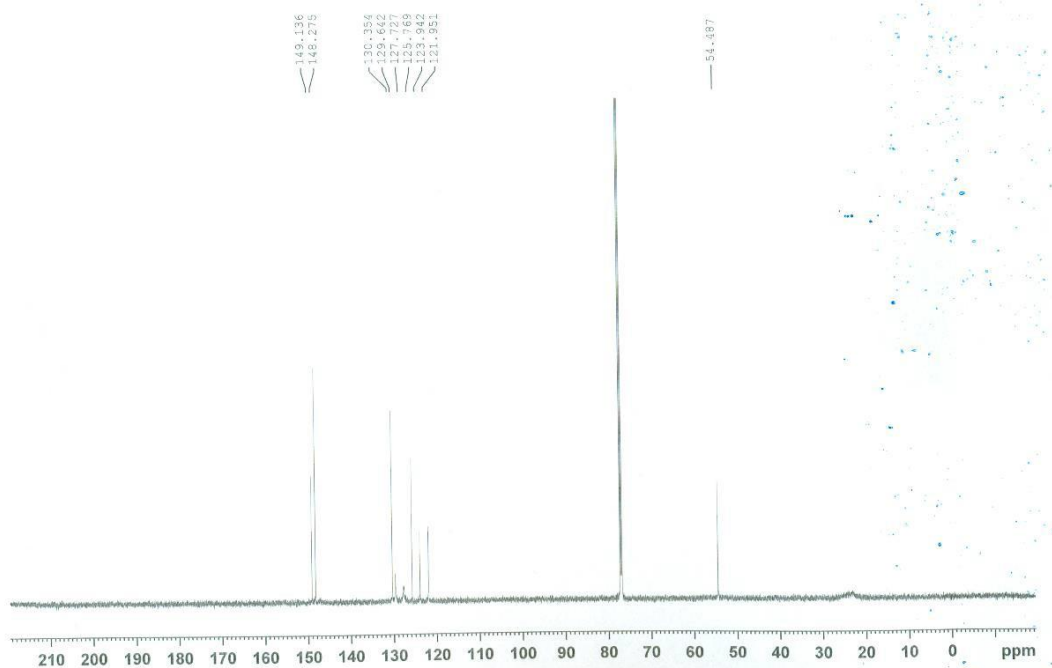

<sup>13</sup>C NMR of 14-(piperidinyethyl)diquinethiazine (2c)

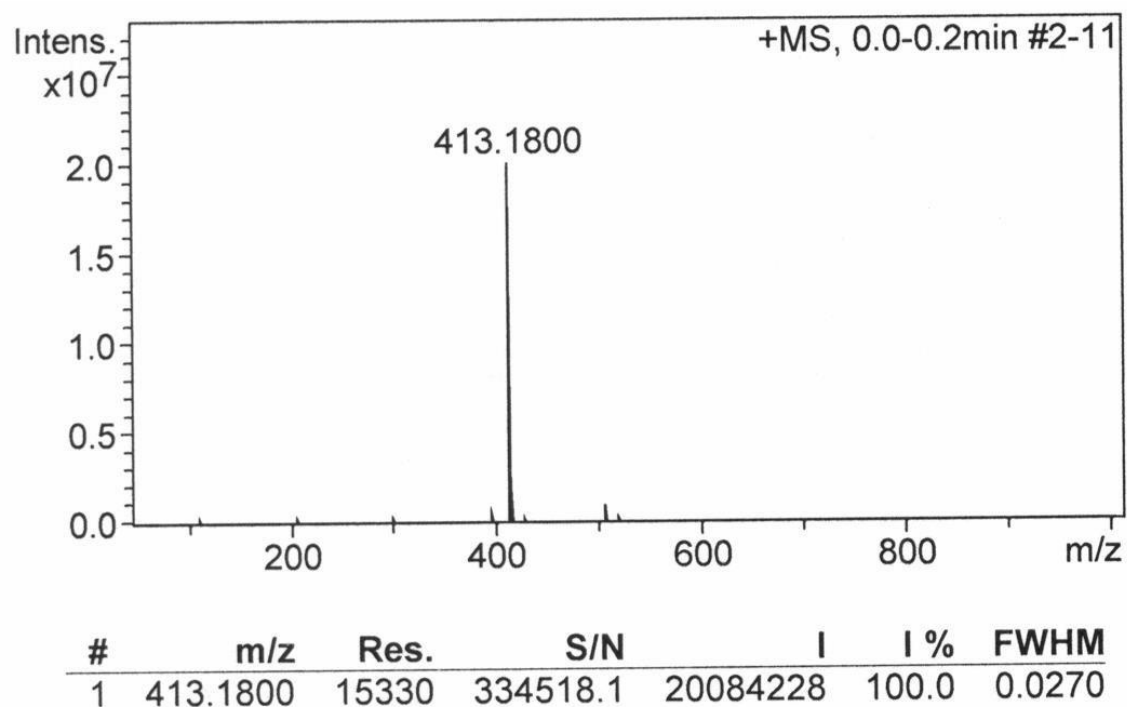

HR MS of 14-(piperidinylolethyl)diquinethiazine (**2c**) (calcd m/z = 413.1800)

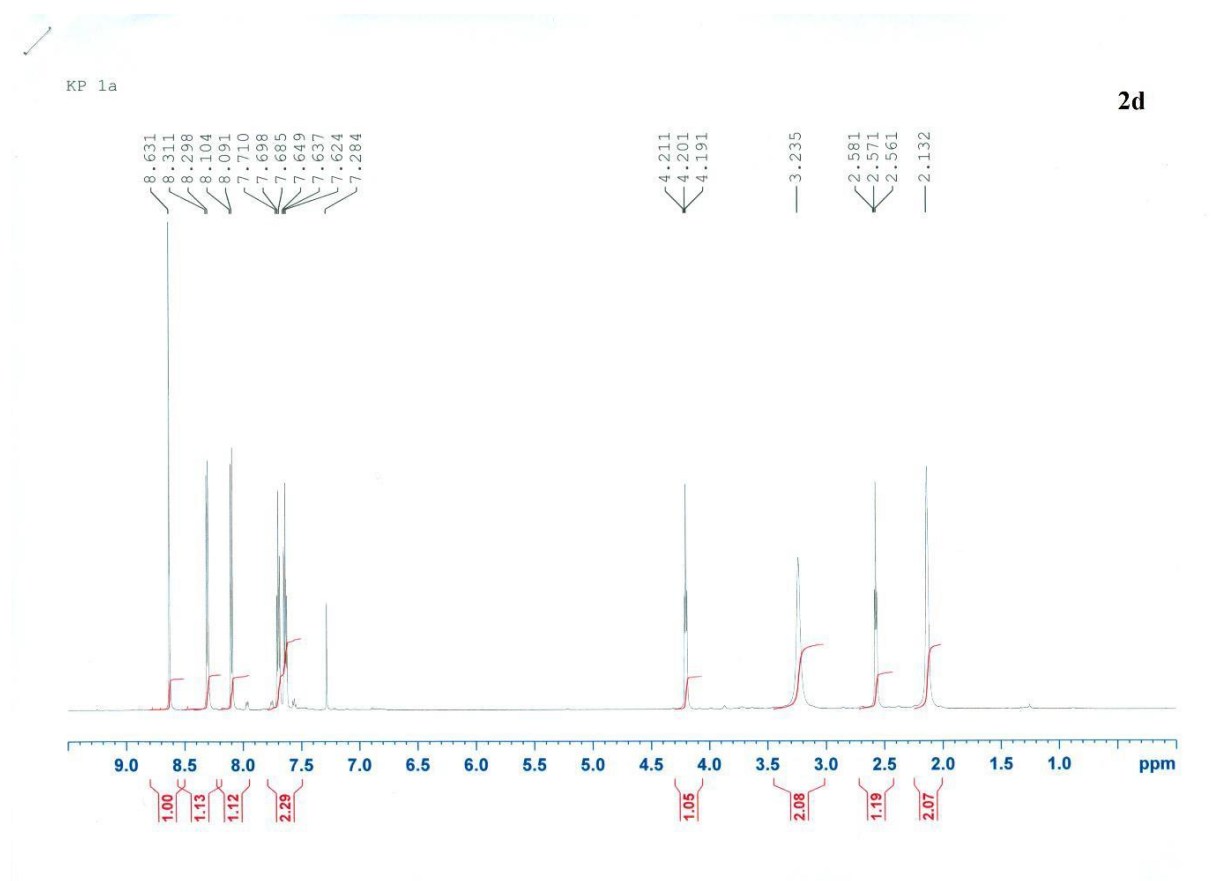

<sup>1</sup>H NMR of 14-(morpholinylethyl)diquinethiazine (**2d**)

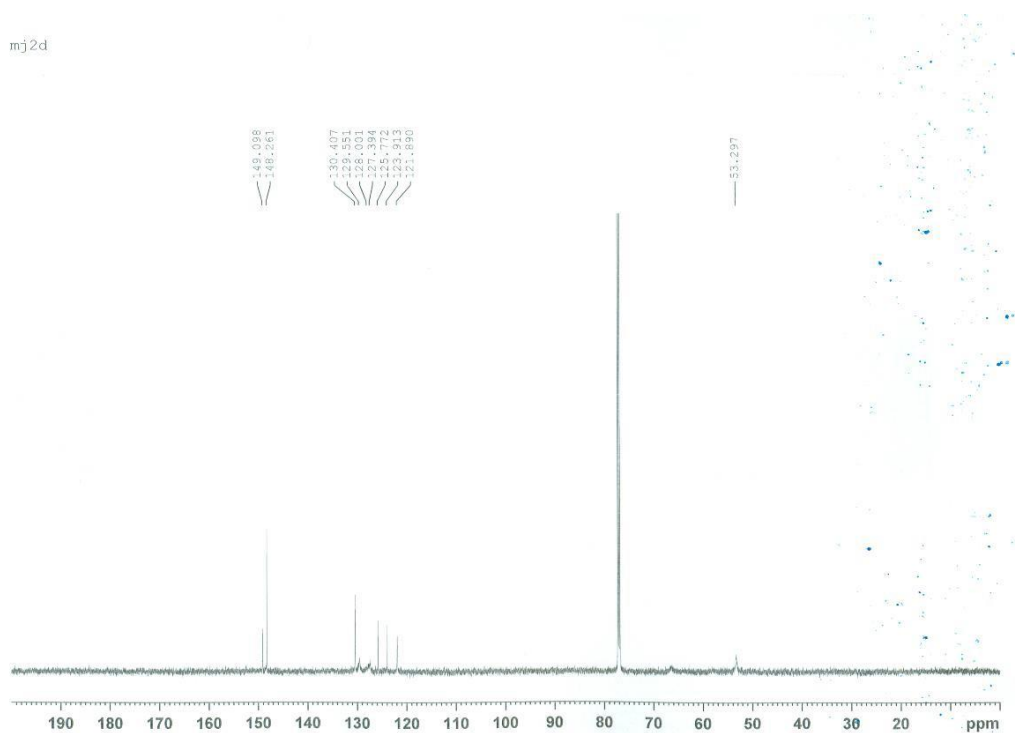

$^{13}\text{C}$  NMR of 14-(morpholinylethyl)diquinotiazine (**2d**)

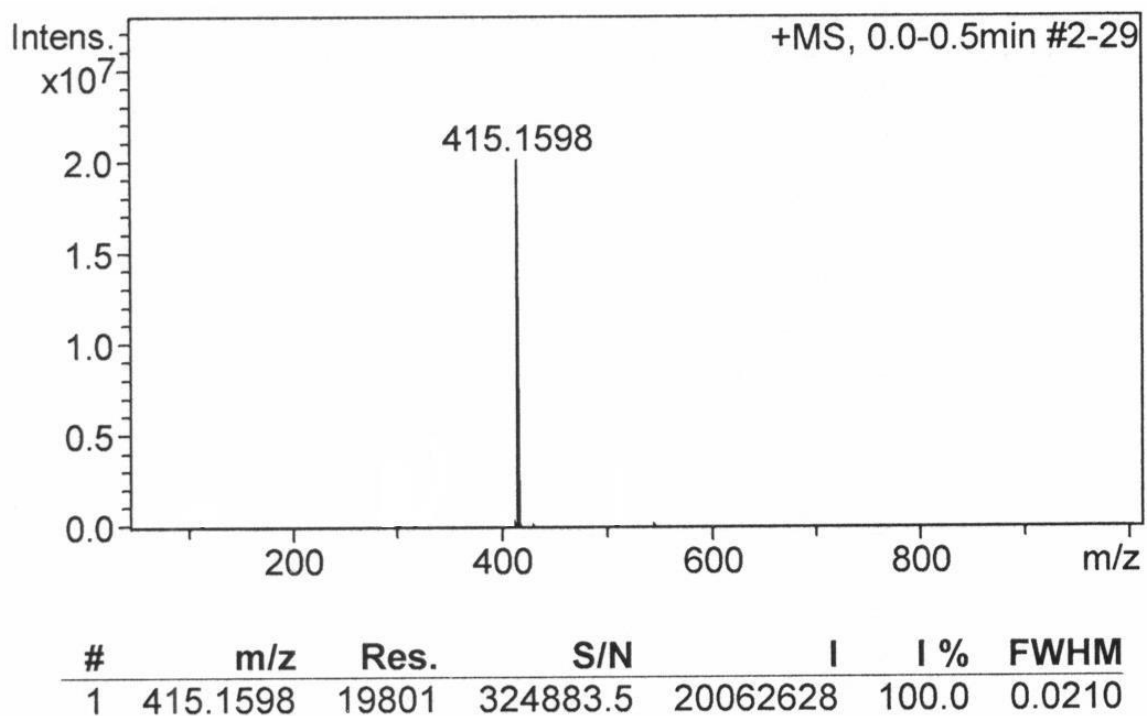

HR MS of 14-(morpholinylethyl)diquinotiazine (**2d**) (calcd m/z = 415.1593)

kpb8a

2e

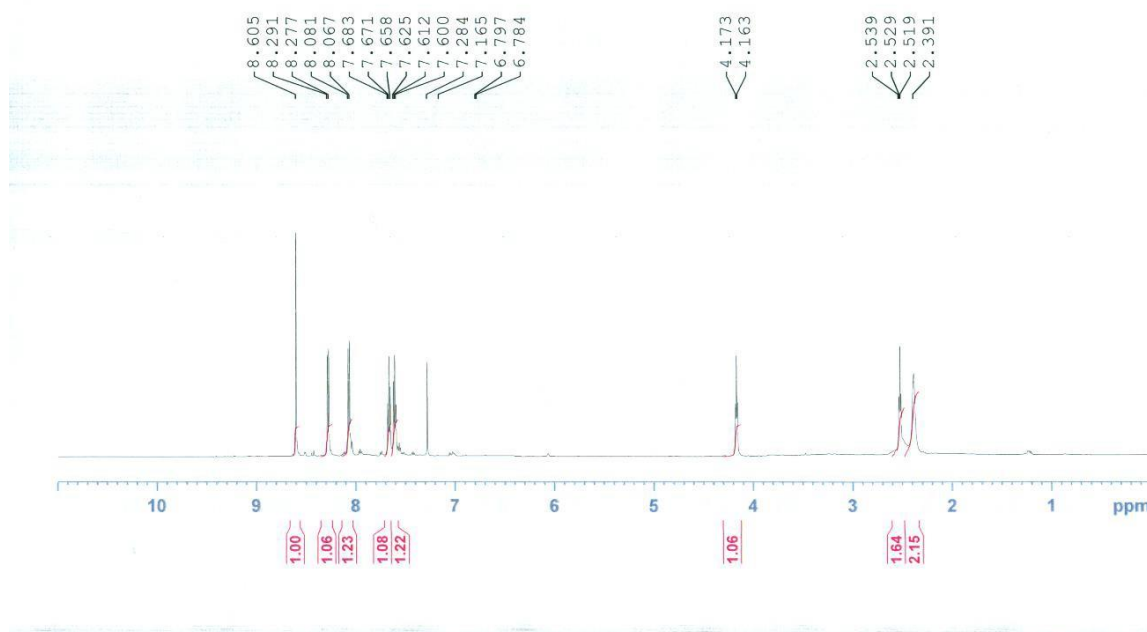

<sup>1</sup>H NMR of 14-(piperazinyloethyl)dichinotiazyny (2e)

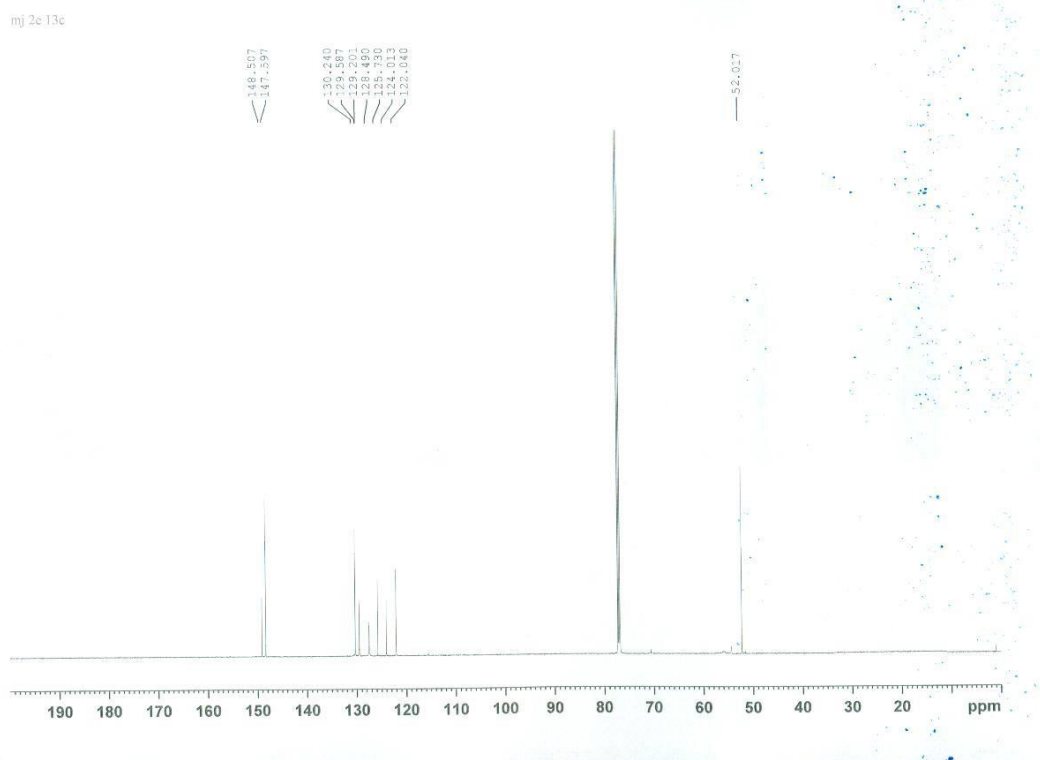

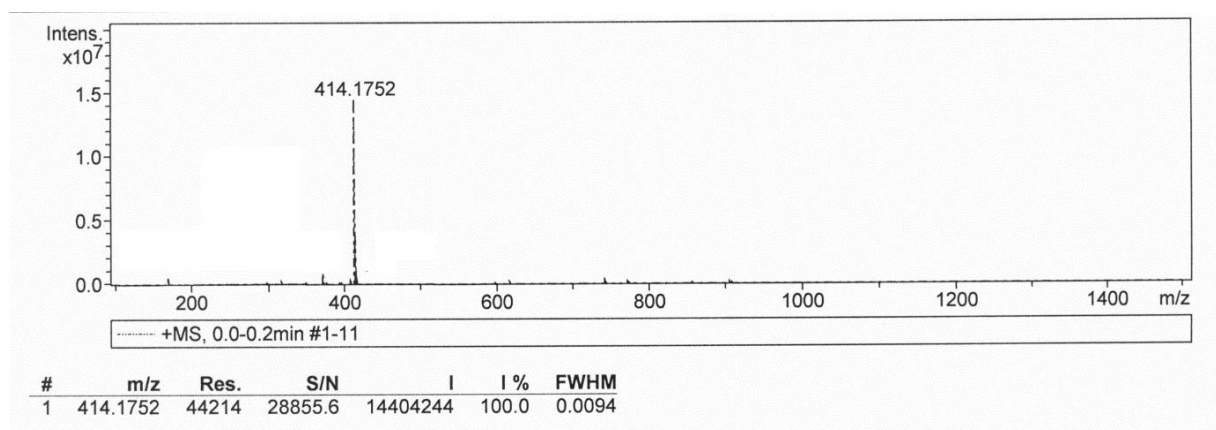

HR MS of 14-(piperazinyloethyl)dichinotiazyny (**2e**) (calcd m/z = 414.1752)

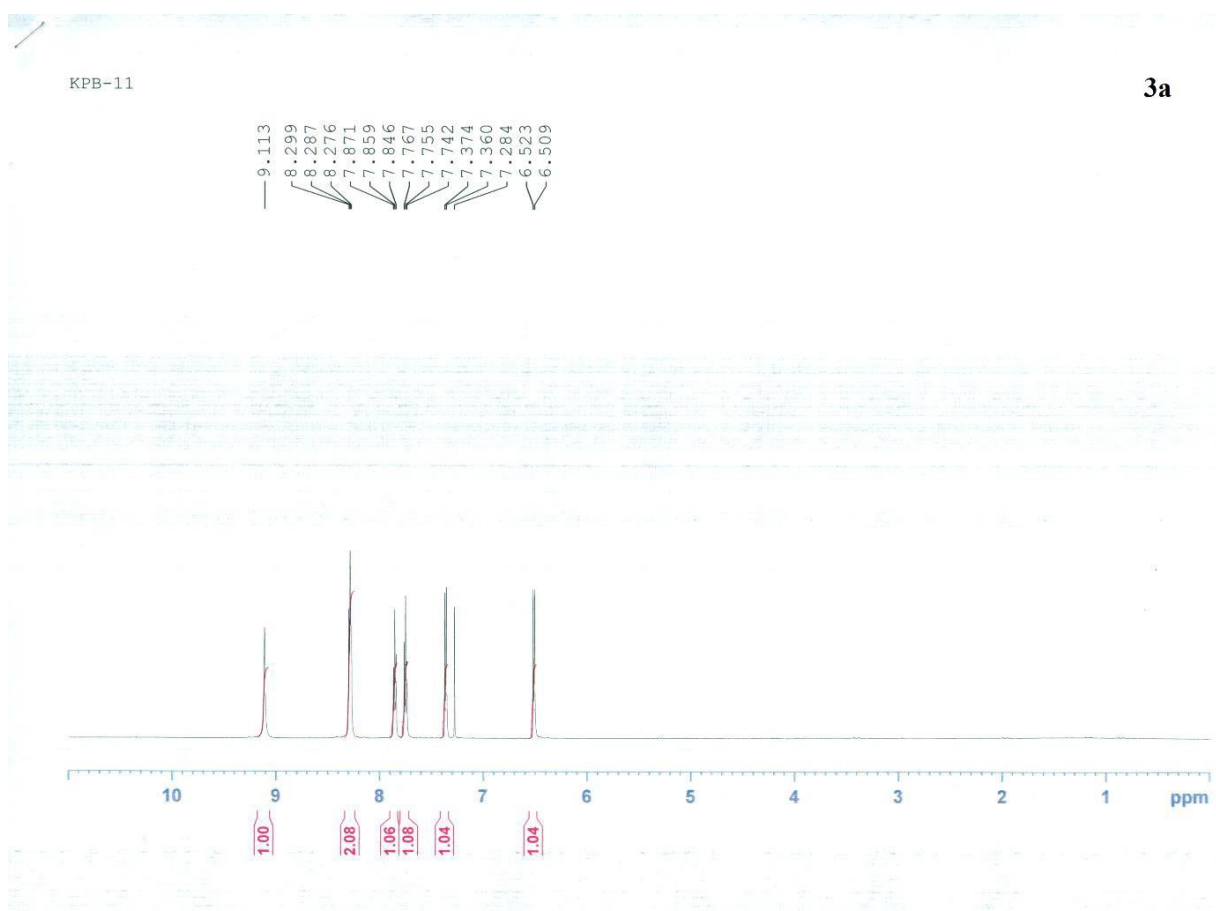

<sup>1</sup>H NMR of 14-(4-cyanophenyl)diquinotiazine (**3a**)



mj3a

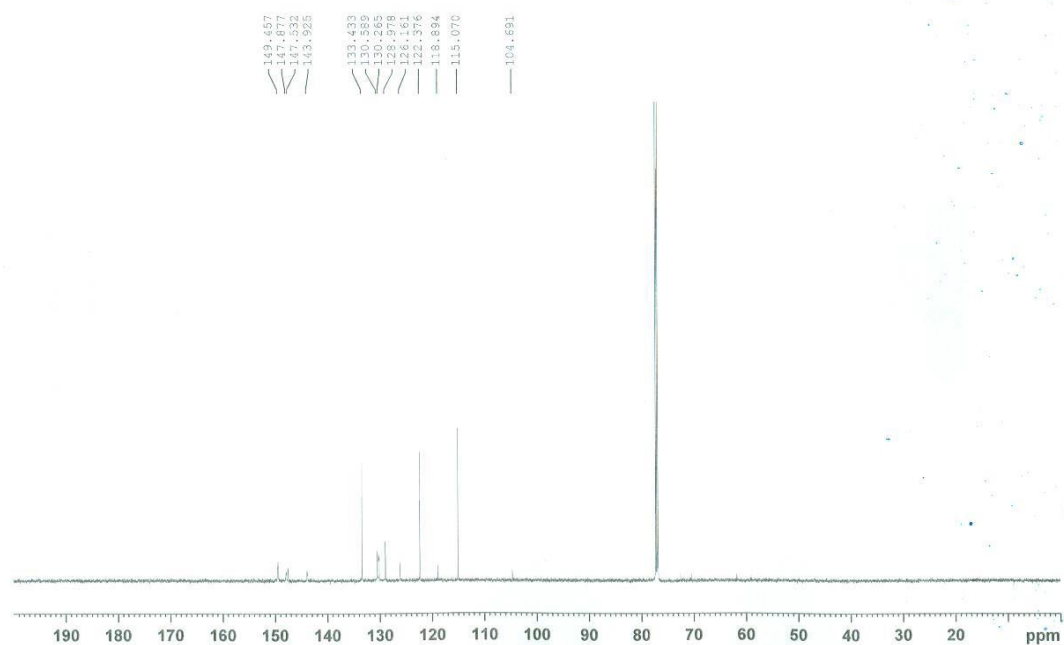

<sup>13</sup>C NMR of 14-(4-cyanophenyl)diquinotiazine (3a)

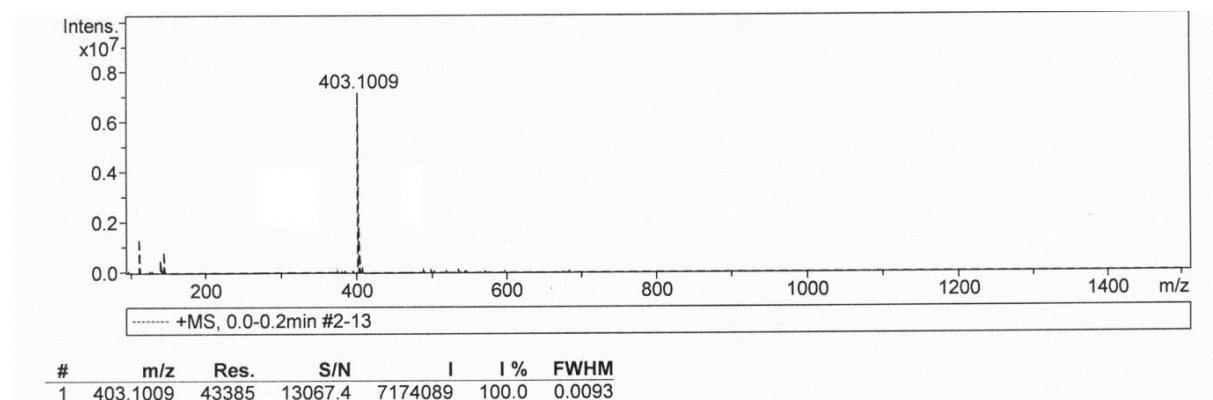

HR MS of 14-(4-cyanophenyl)diquinotiazine (3a) (calcd m/z = 403.1007)

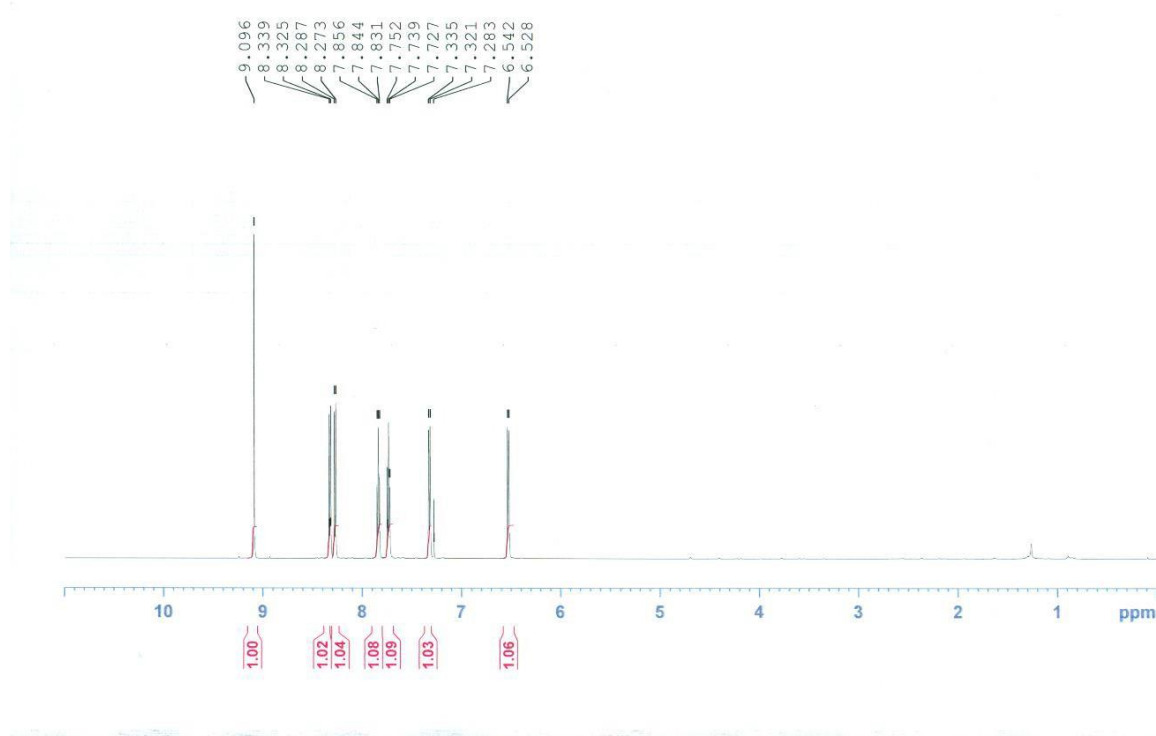

$^1\text{H}$  NMR of 14-(4-trifluoromethylphenyl)diquinothiazine (**3b**)

mj3b

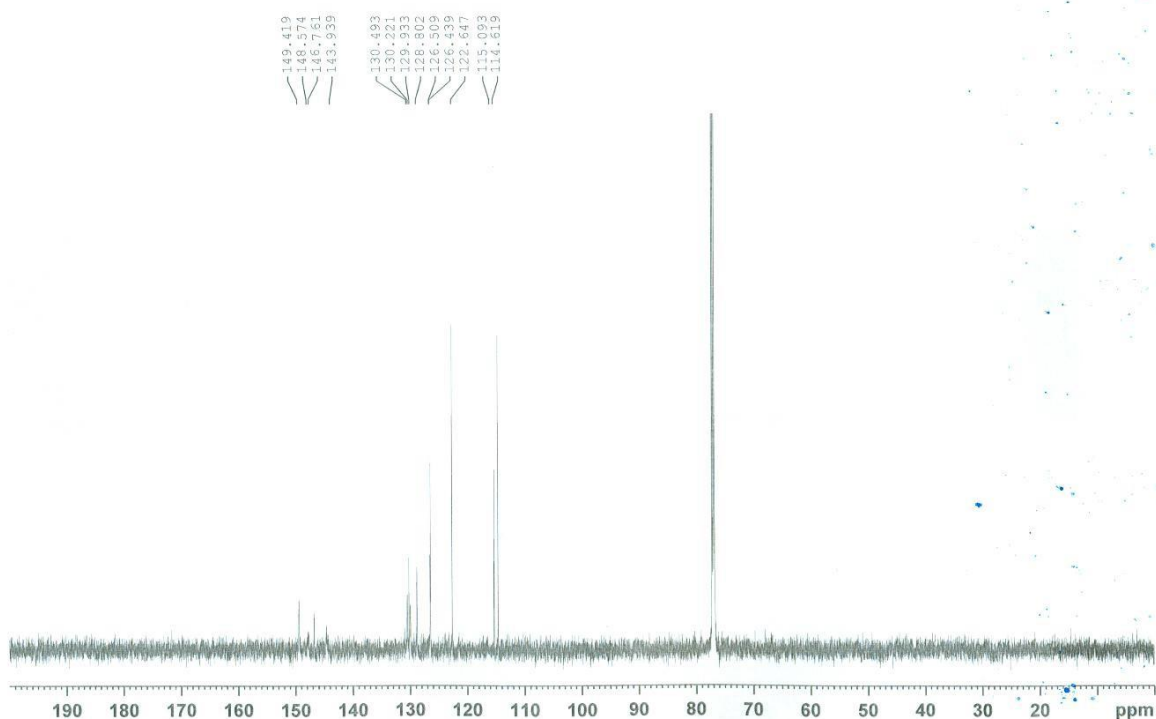

$^{13}\text{C}$  NMR of 14-(4-trifluoromethylphenyl)diquinotiazine (**3b**)

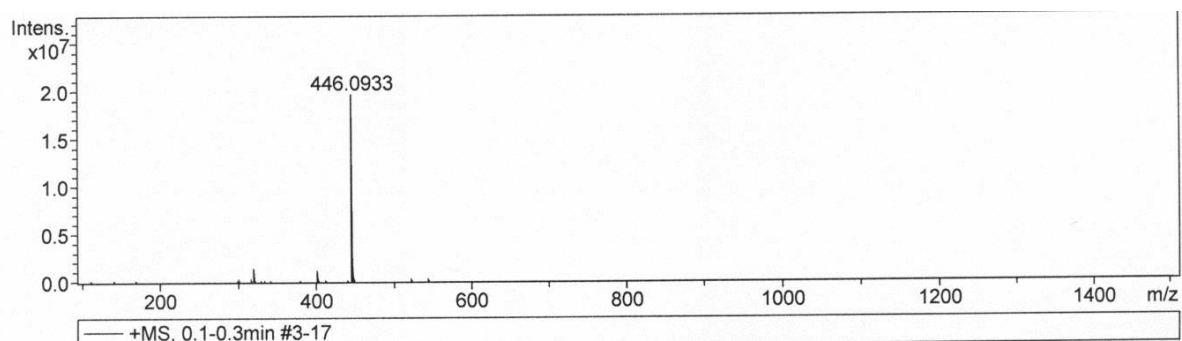

| # | $m/z$    | Res.  | S/N     | I        | I %   | FWHM   |
|---|----------|-------|---------|----------|-------|--------|
| 1 | 446.0933 | 18366 | 74183.1 | 19566588 | 100.0 | 0.0243 |

HR MS of 14-(4-trifluoromethylphenyl)diquinotiazine (**3b**) (calcd  $m/z$  = 446.0939)

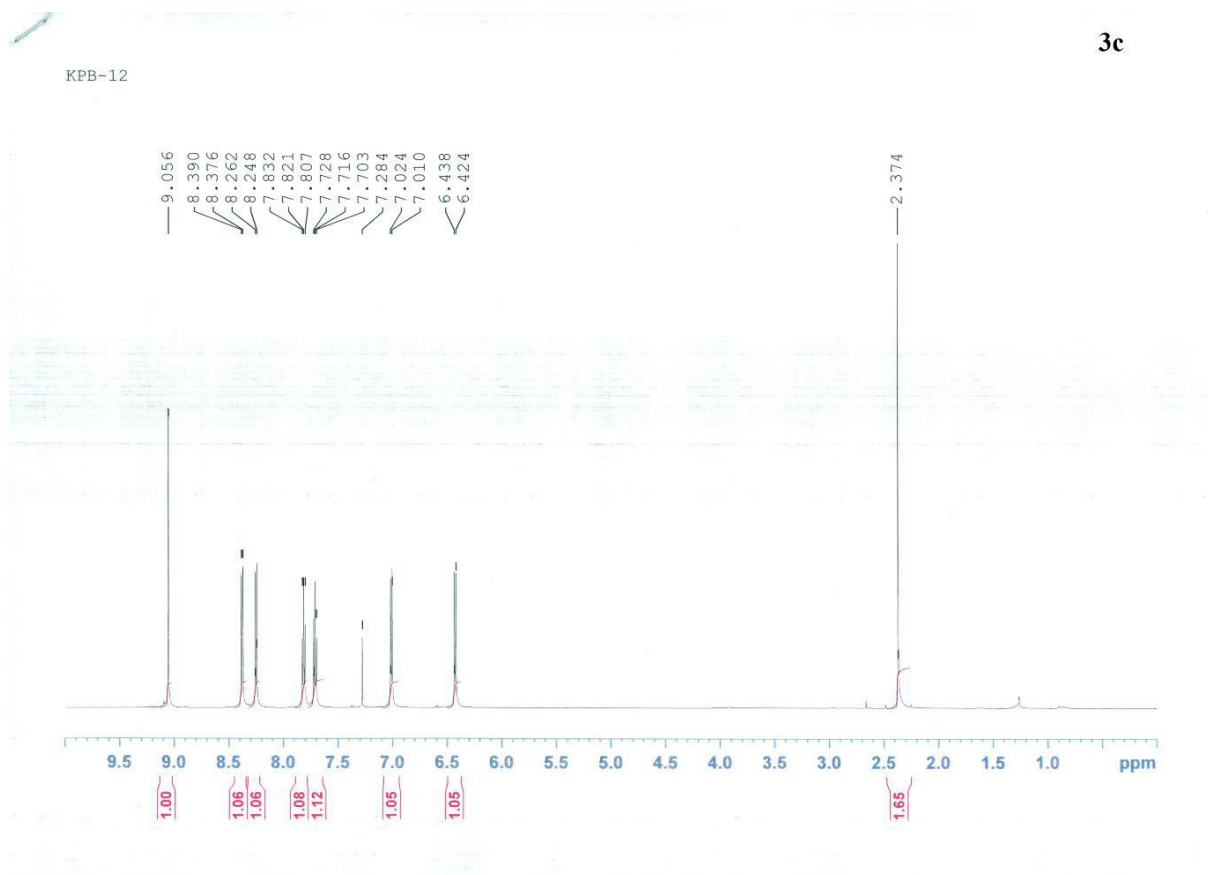

$^1\text{H}$  NMR of 14-(methylthiophenyl)diquinotiazine (**3c**)

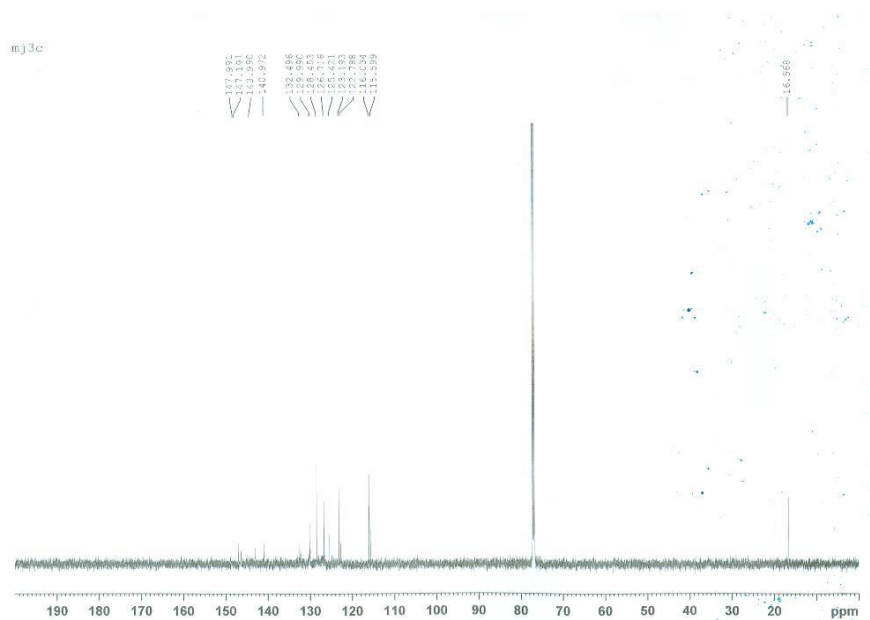

$^{13}\text{C}$  NMR of 14-(methylthiophenyl)diquinotiazine (**3c**)

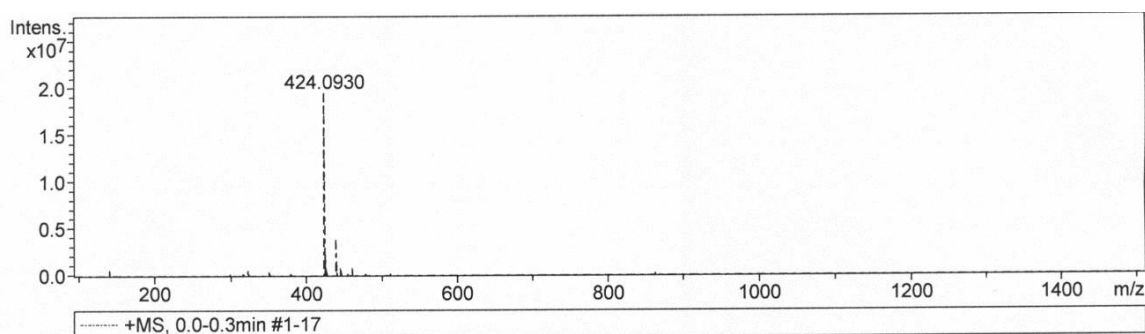

| # | m/z      | Res.  | S/N      | I        | I %   | FWHM   |
|---|----------|-------|----------|----------|-------|--------|
| 1 | 424.0930 | 26963 | 112446.6 | 19423724 | 100.0 | 0.0157 |

HR MS of 14-(methylthiophenyl)diquinothiazine (**3c**) (calcd m/z = 424.0942)

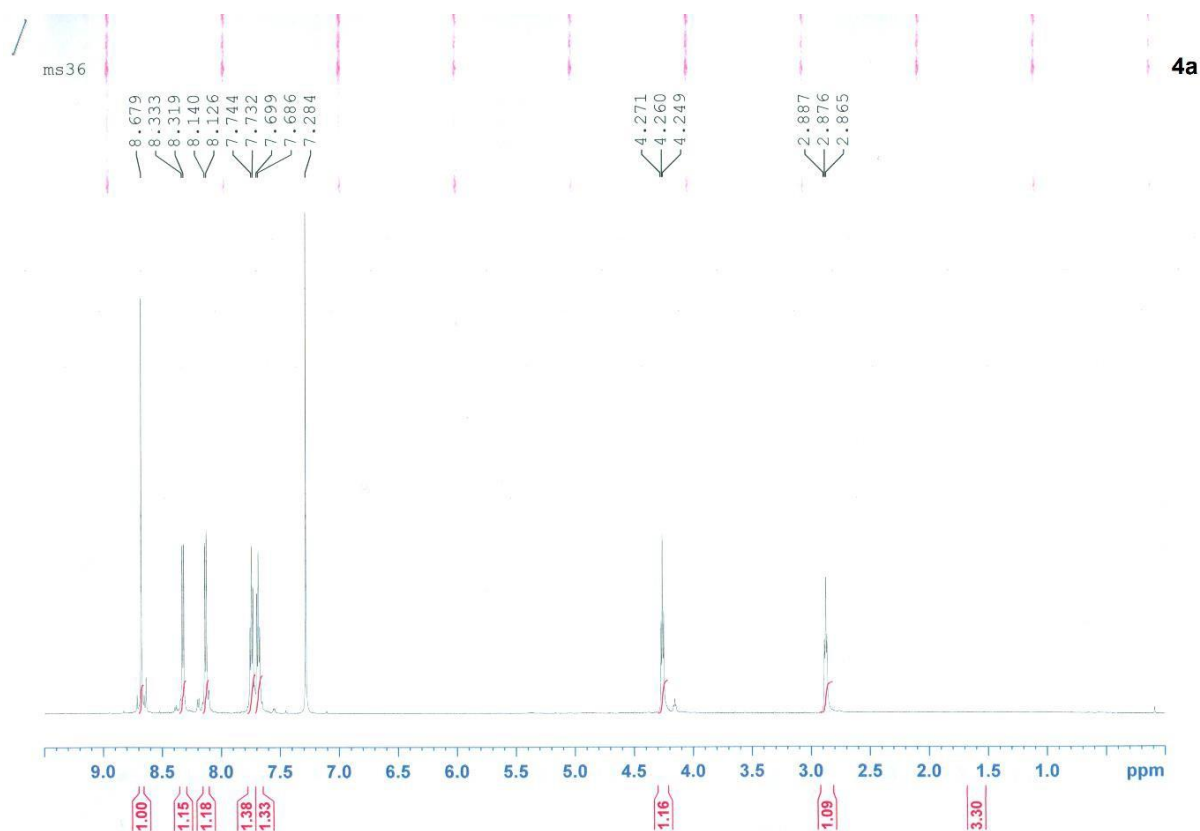

$^1\text{H}$  NMR of 14-aminoethyldiquinothiazine (**4a**)

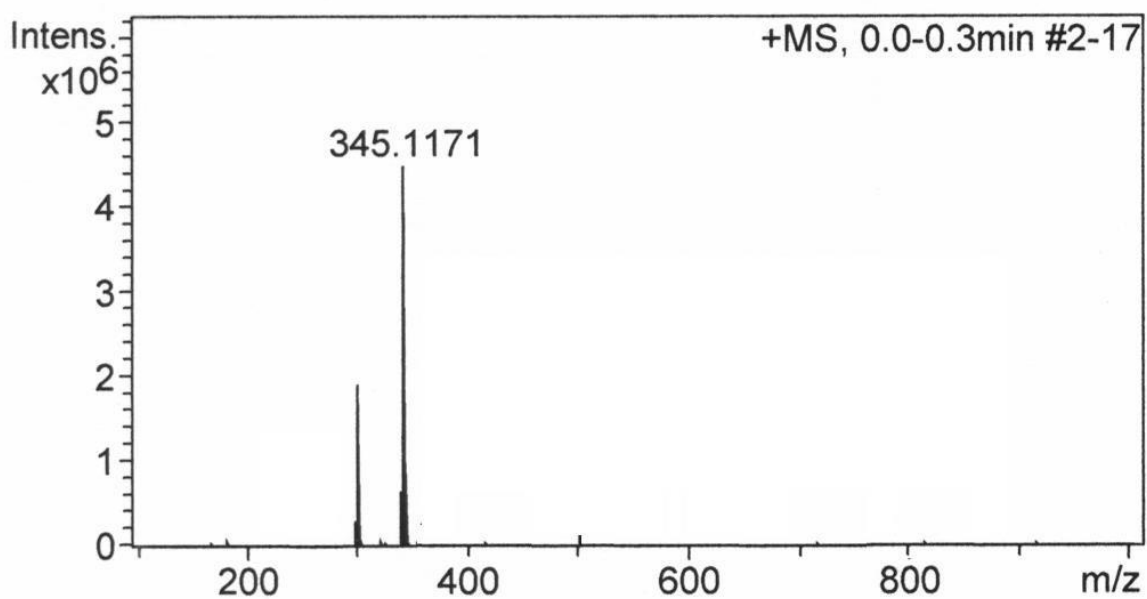

| # | m/z      | Res.  | S/N     | I       | I %   | FWHM   |
|---|----------|-------|---------|---------|-------|--------|
| 1 | 302.0748 | 35795 | 26541.8 | 1916610 | 42.7  | 0.0084 |
| 2 | 345.1171 | 40659 | 50348.4 | 4490263 | 100.0 | 0.0085 |

HR MS of 14-aminoethyldiquinothiazine (**4a**) (calcd m/z = 345.1174)

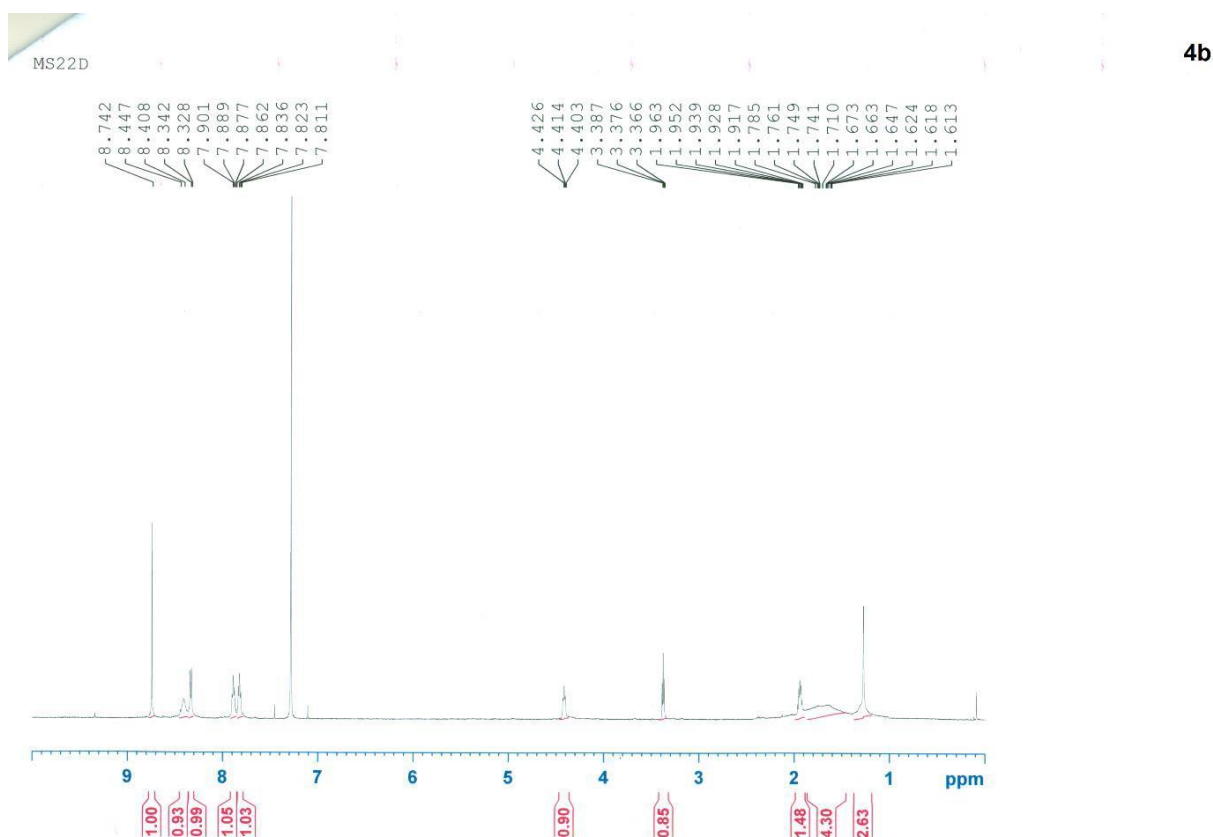

<sup>1</sup>H NMR of 14-aminopropylidiquinothiazine (**4b**)

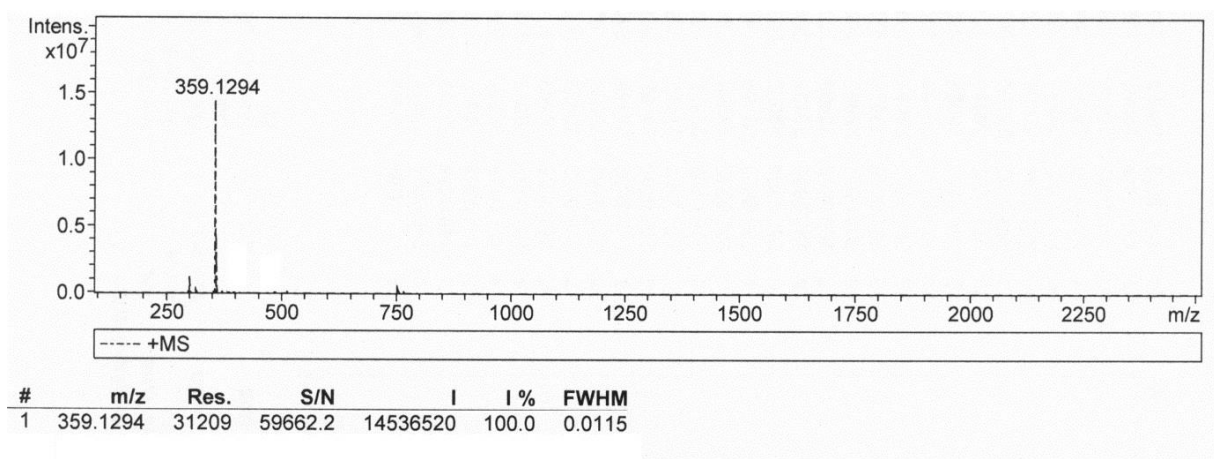

HR MS of 14-aminopropylthiazine (**4b**) (calcd m/z = 359.1330)

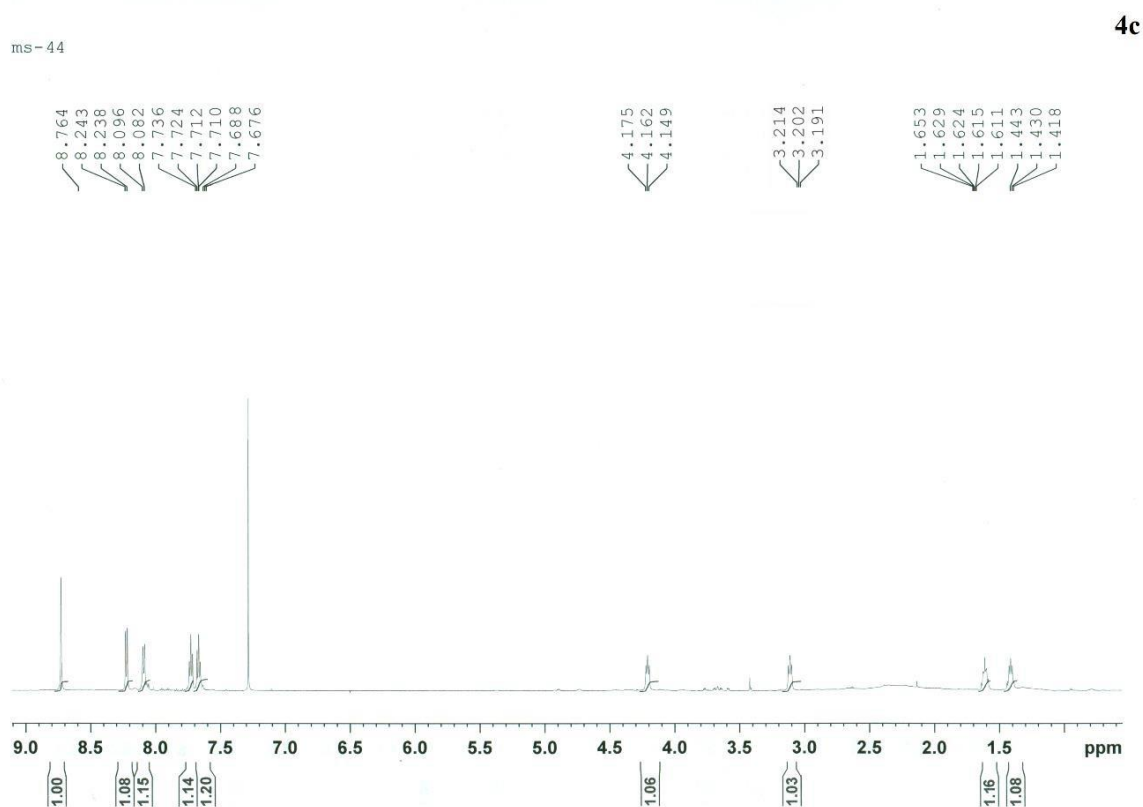

$^1\text{H}$  NMR of 14-aminobutylthiazine (**4c**)

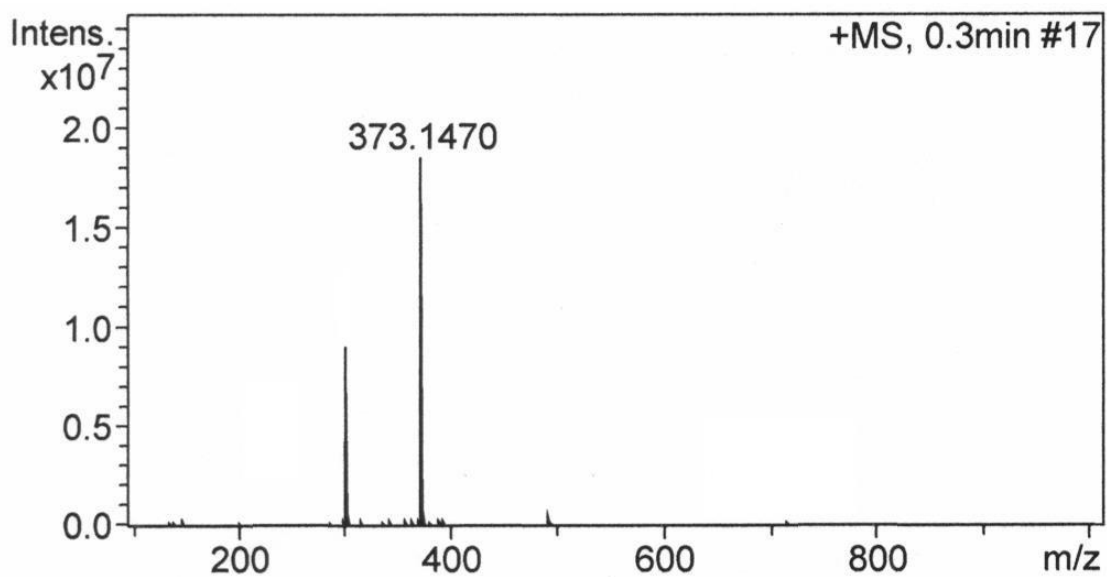

| # | m/z      | Res.  | S/N     | I        | I %   | FWHM   |
|---|----------|-------|---------|----------|-------|--------|
| 1 | 302.0736 | 40175 | 46209.3 | 12777708 | 49.2  | 0.0075 |
| 2 | 373.1470 | 40073 | 51771.1 | 18462910 | 100.0 | 0.0093 |

HR MS of 14-aminobuthyldiquinothiazine (**4c**) (calcd m/z = 373.1487)

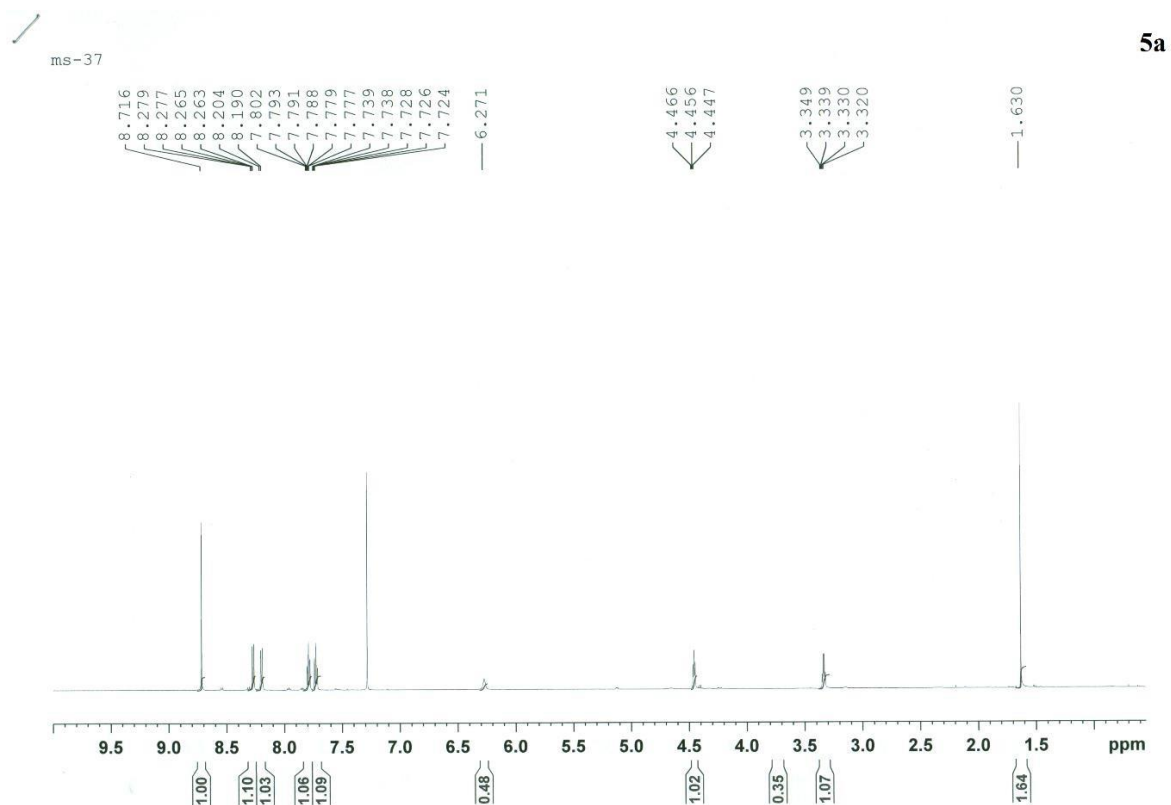



<sup>1</sup>H NMR of 14-acetylaminoethyldiquinothiazine (**5a**)

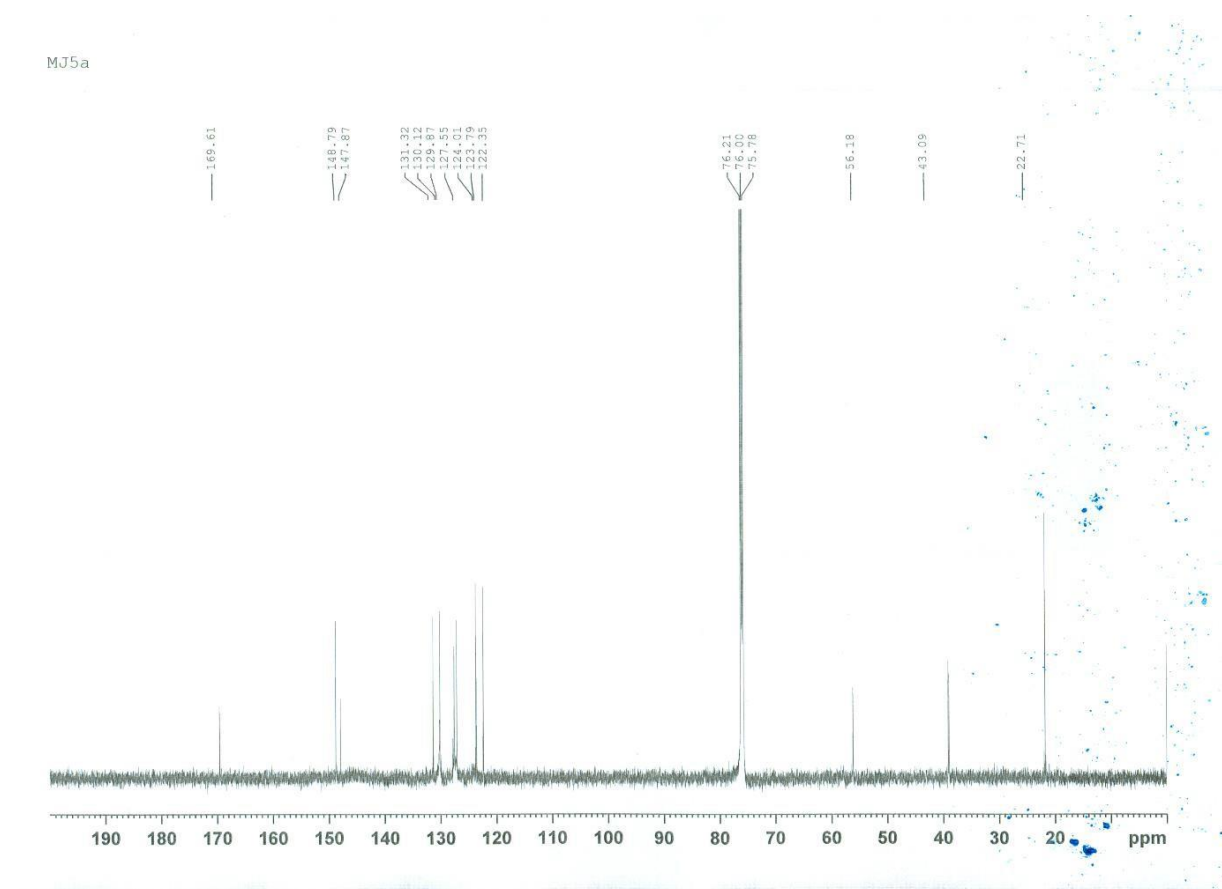

<sup>13</sup>C NMR of 14-acetylaminoethyldiquinothiazine (**5a**)

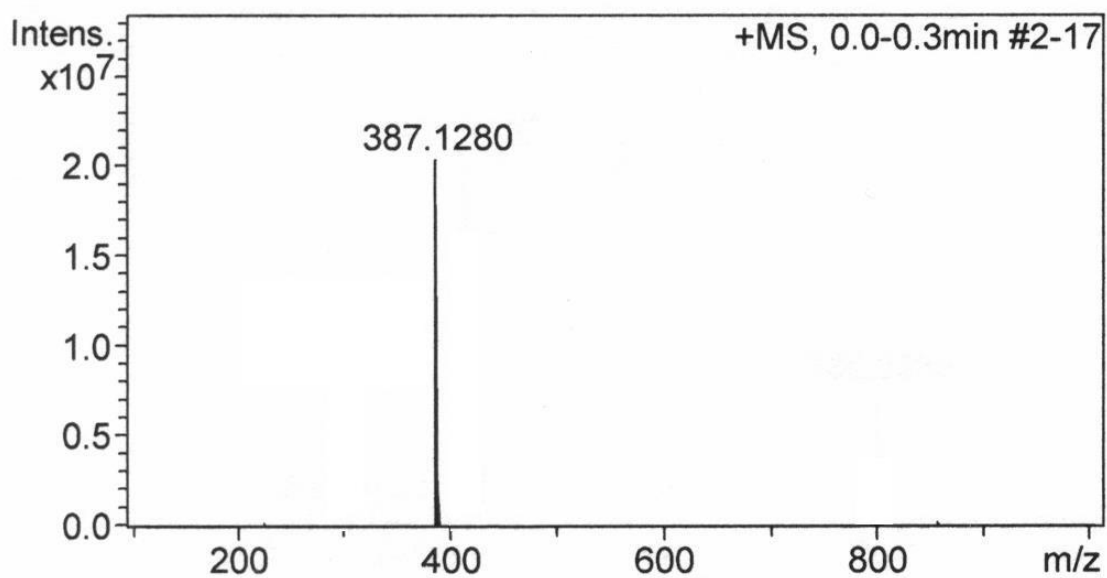

| # | m/z      | Res.  | S/N     | I        | I %   | FWHM   |
|---|----------|-------|---------|----------|-------|--------|
| 1 | 387.1280 | 19027 | 47882.4 | 20377582 | 100.0 | 0.0203 |

HR MS of 14-acetylaminoethyldiquinothiazine (5a) (calcd m/z = 387.1280)

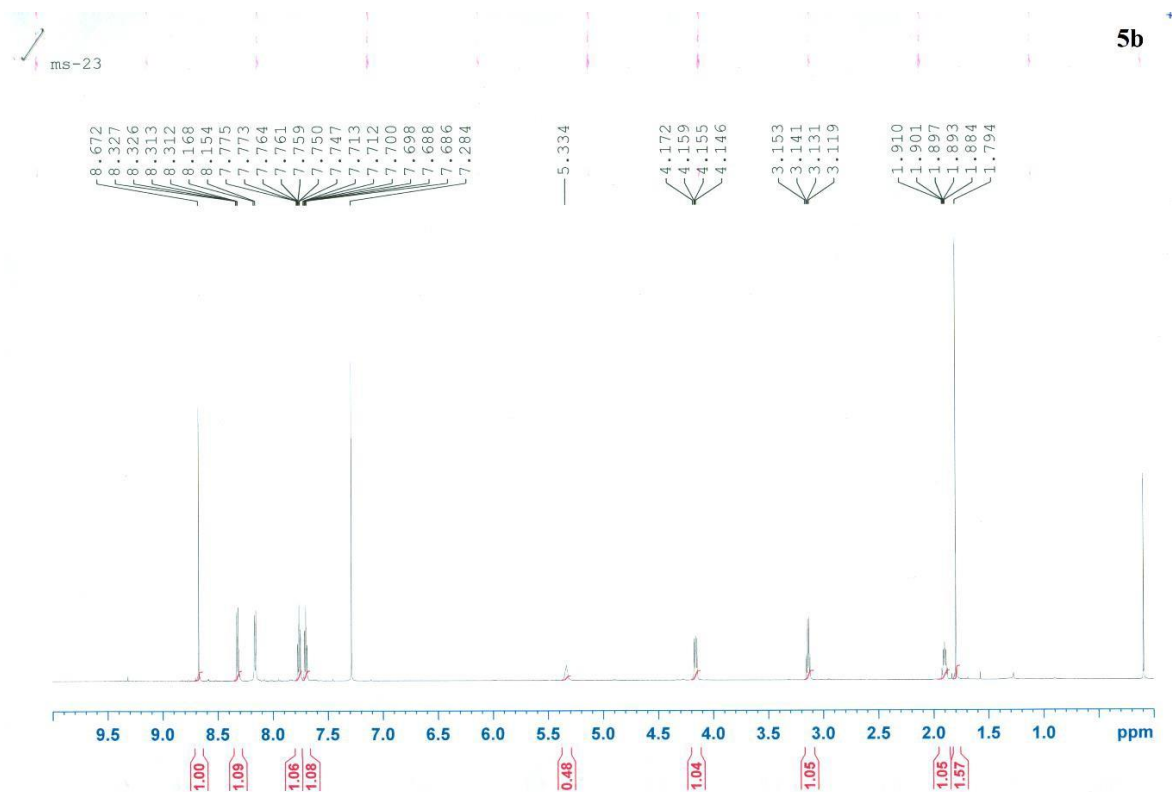

<sup>1</sup>H NMR of 14-acetylamino-propyldiquinothiazine (**5b**)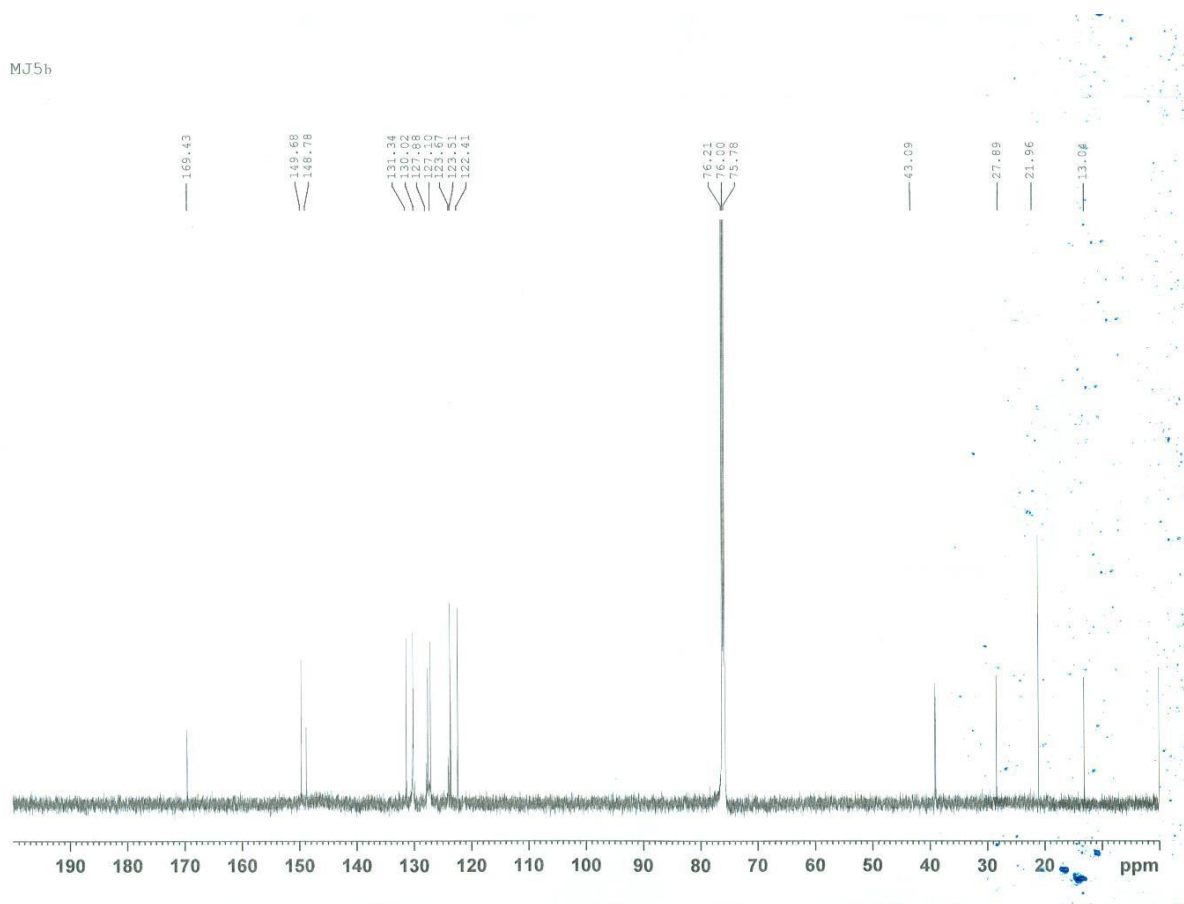 $^{13}\text{C}$  NMR of 14-acetylamino-propyldiquinothiazine (**5b**)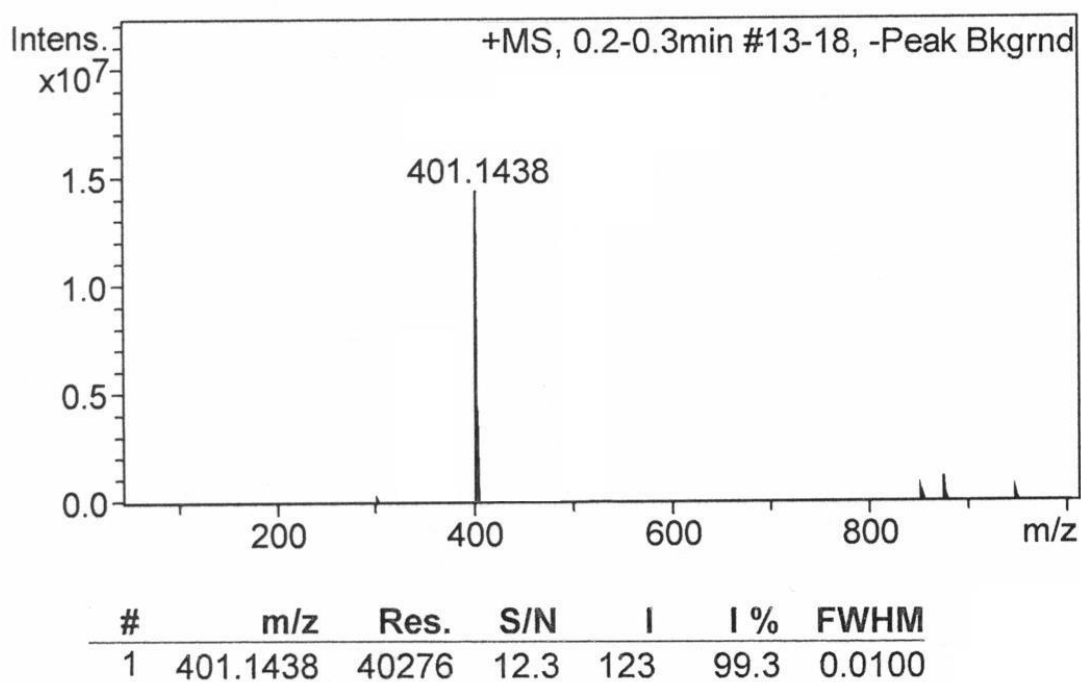

HR MS of 14-acetylaminoethylidiquinethiazine (**5b**) (calcd  $m/z$  = 401.1436)

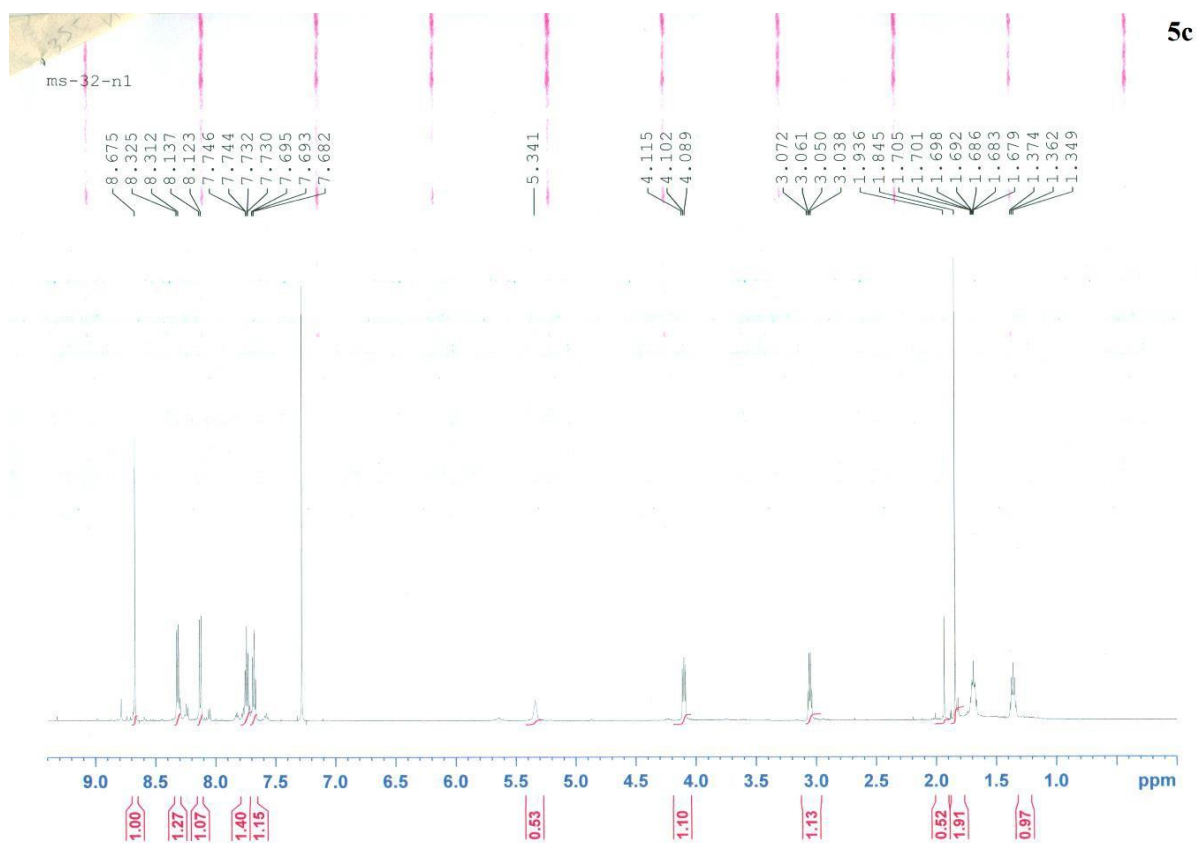

$^1\text{H}$  NMR of 14-acetylaminoethylidiquinethiazine (**5c**)

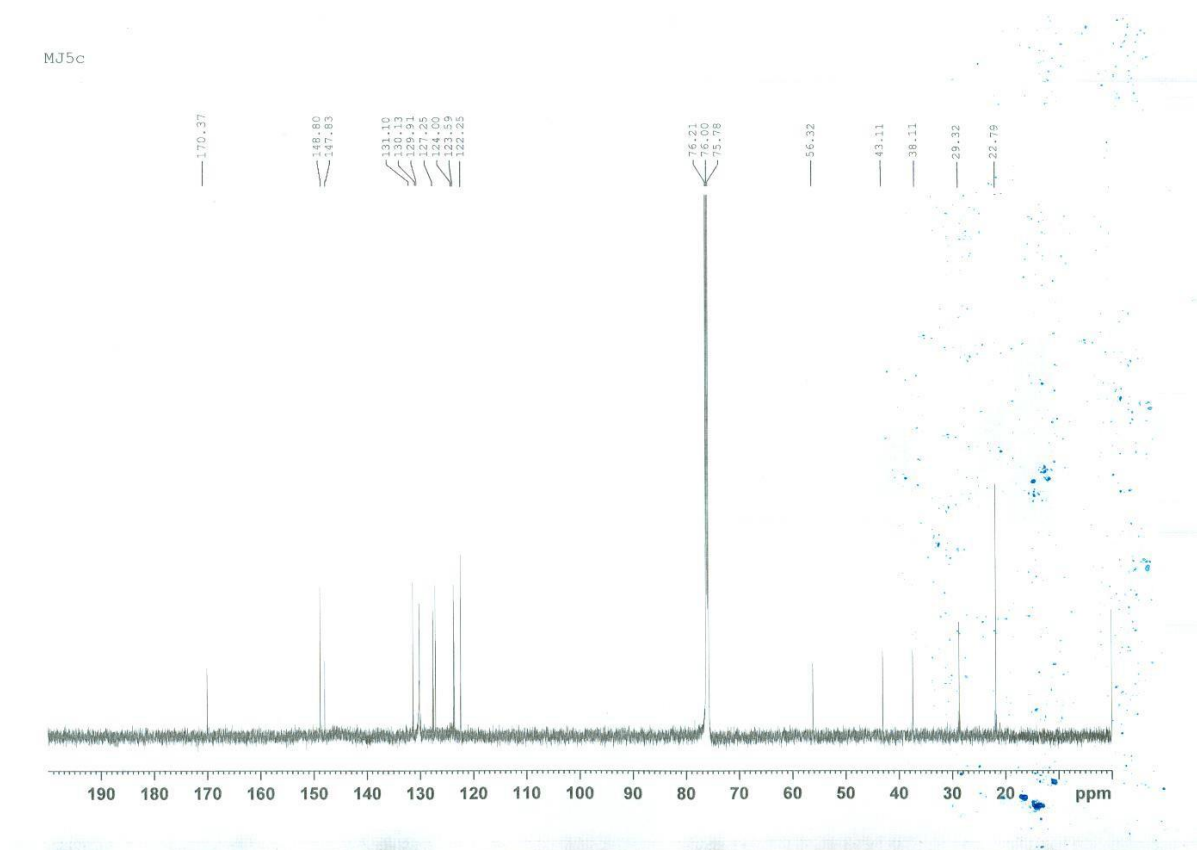

$^{13}\text{C}$  NMR of 14-acetylaminoethylidiquinethiazine (**5c**)

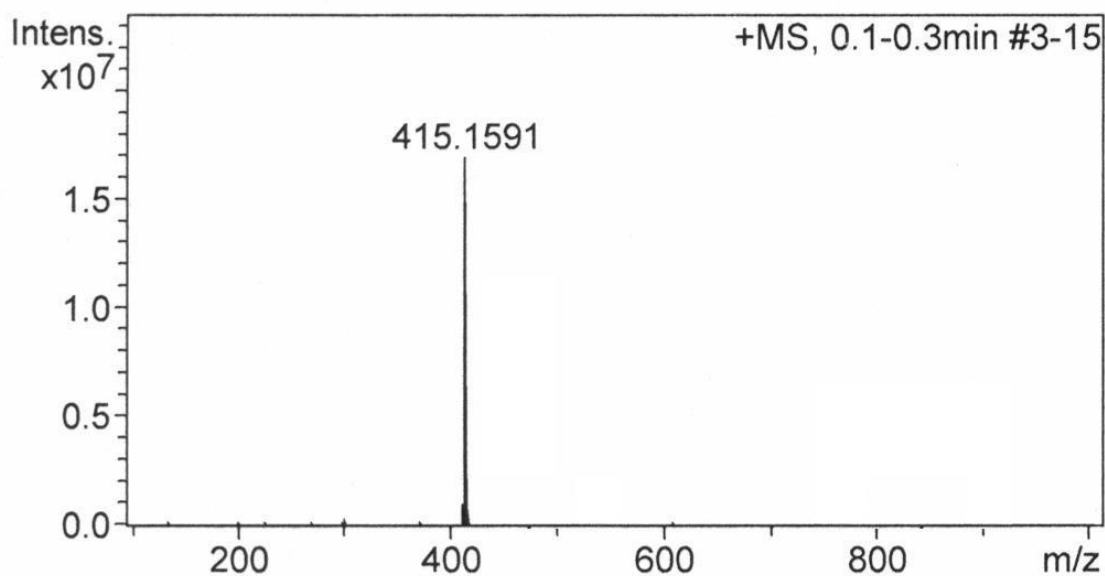

| # | m/z      | Res.  | S/N     | I        | I %   | FWHM   |
|---|----------|-------|---------|----------|-------|--------|
| 1 | 415.1591 | 44713 | 52916.7 | 16883390 | 100.0 | 0.0093 |

HR MS of 14-acetylaminoethylidiquinethiazine (**5c**) (calcd m/z = 415.1593)

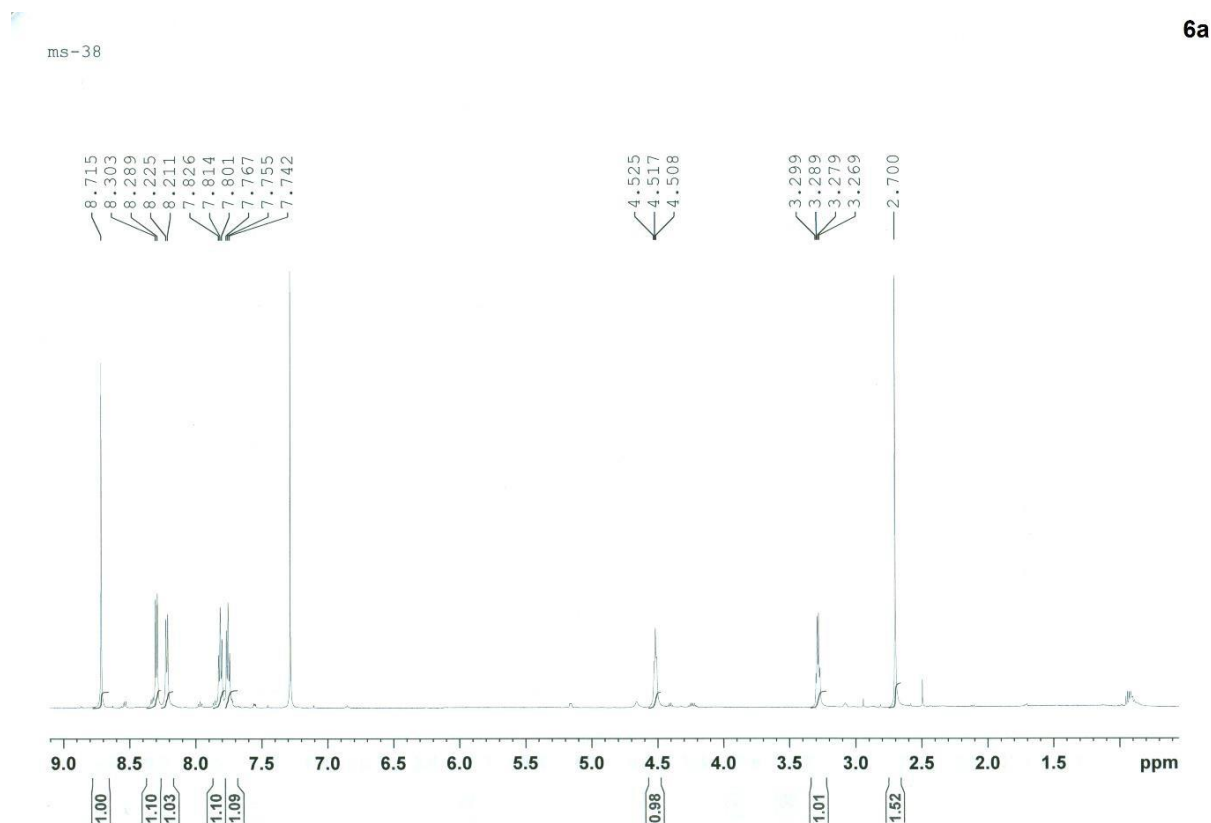

<sup>1</sup>H NMR of 14-methanesulfonylaminoethylidiquinethiazine (**6a**)

MJ6a

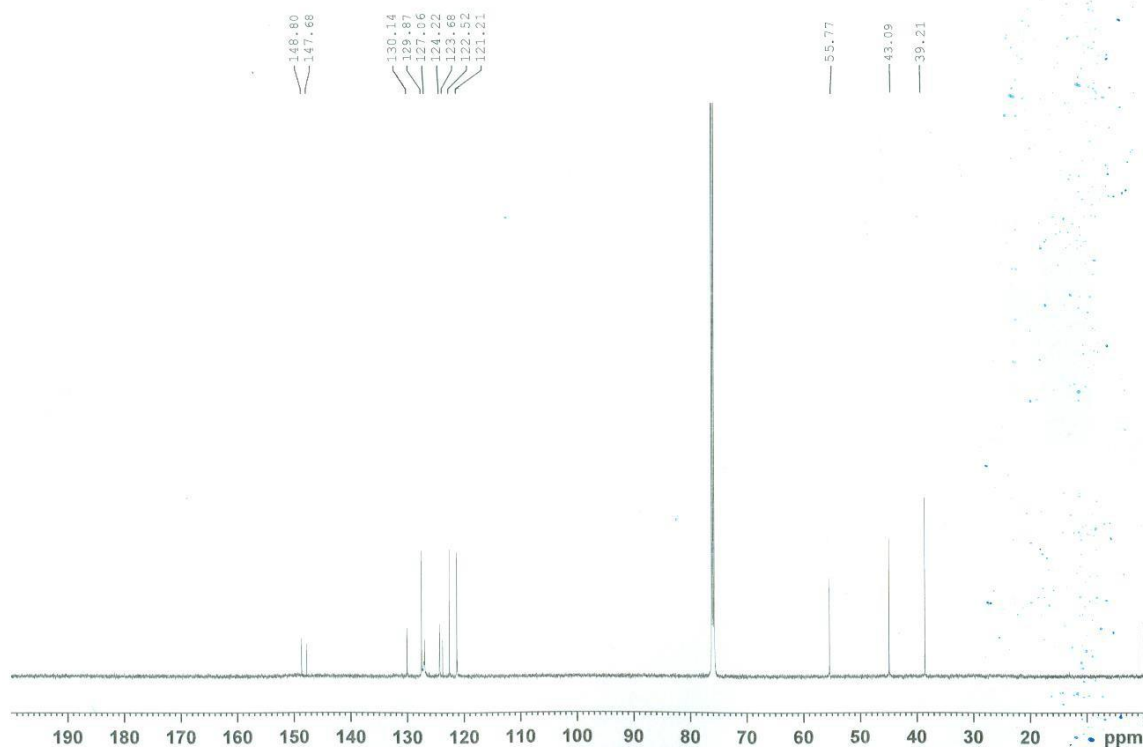

$^{13}\text{C}$  NMR of 14-methanesulfonylaminoethyldiquinothiazine (**6a**)

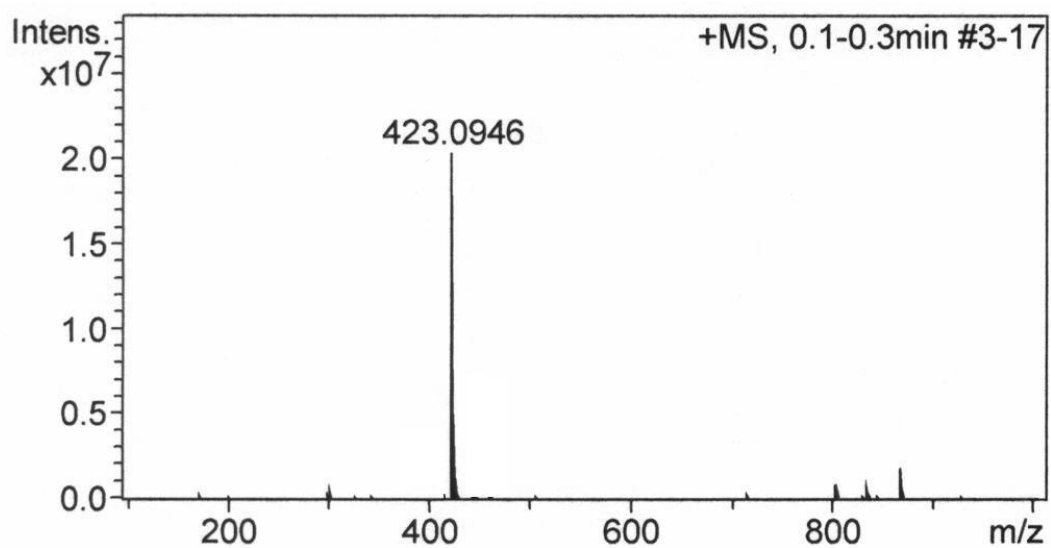

| # | m/z      | Res.  | S/N     | I        | I %   | FWHM   |
|---|----------|-------|---------|----------|-------|--------|
| 1 | 423.0946 | 16772 | 37580.9 | 20377596 | 100.0 | 0.0252 |

HR MS of 14-methanesulfonylaminoethyldiquinothiazine (**6a**) (calcd m/z = 423.0949)

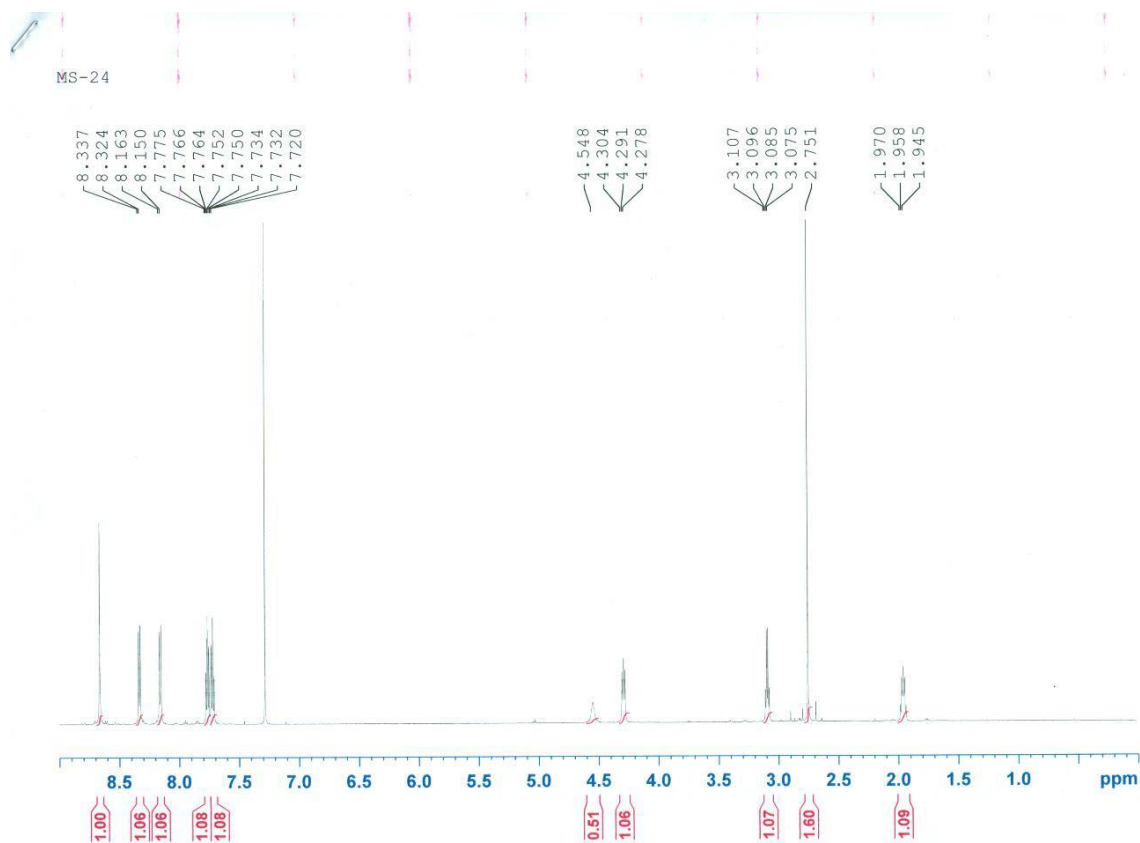

$^1\text{H}$  NMR of 14-methanesulfonylaminopropyldiquinethiazine (**6b**)

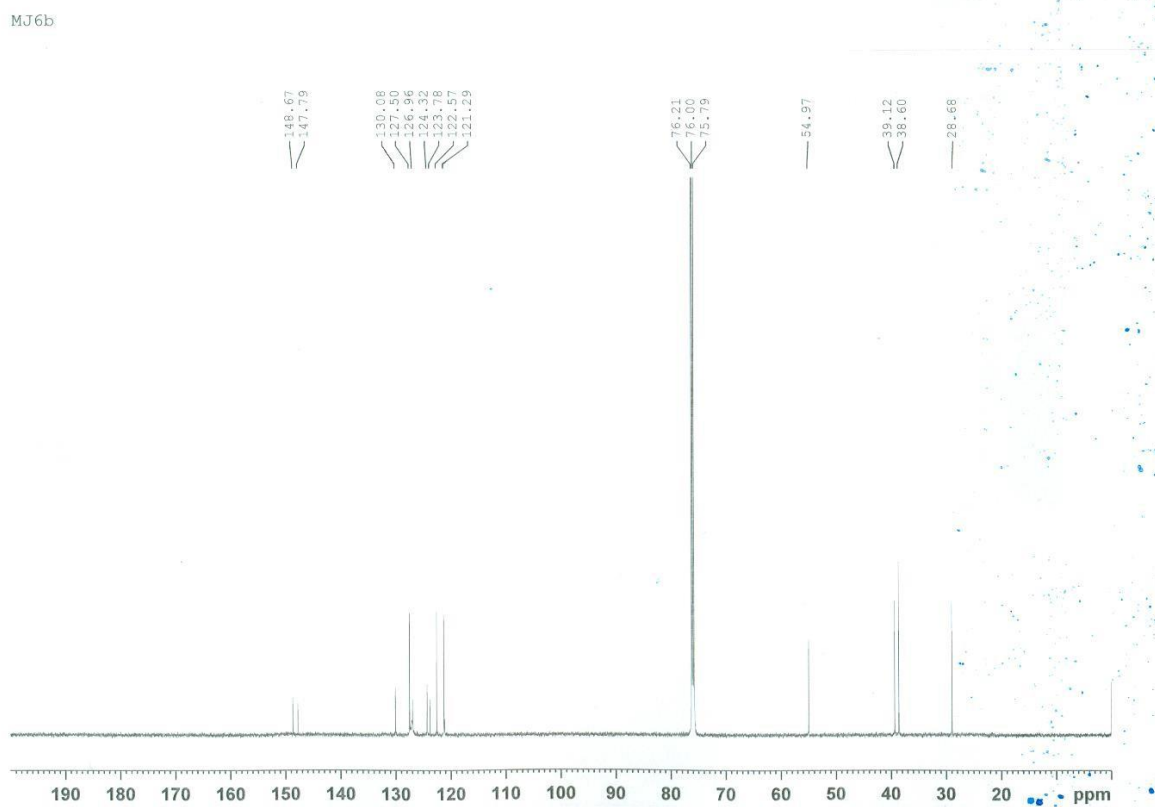

$^{13}\text{C}$  NMR of 14-methanesulfonylaminopropyldiquinothiazine (**6b**)

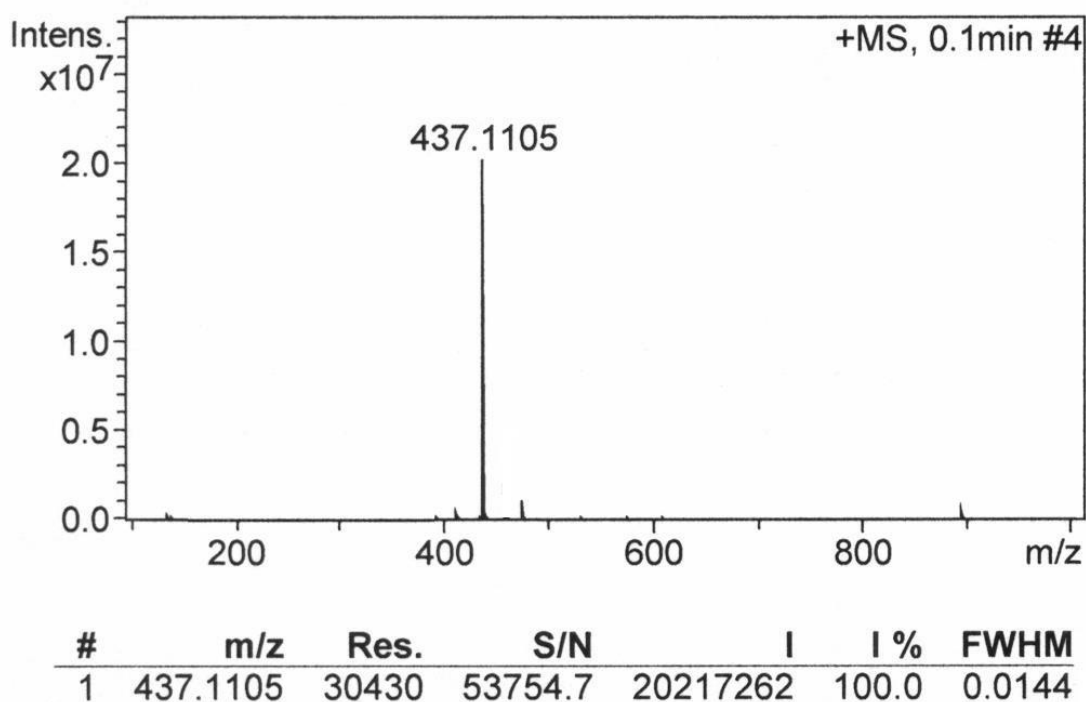

HR MS of 14-methanesulfonylaminopropyldiquinothiazine (**6b**) (calcd  $m/z$  = 437.1106)

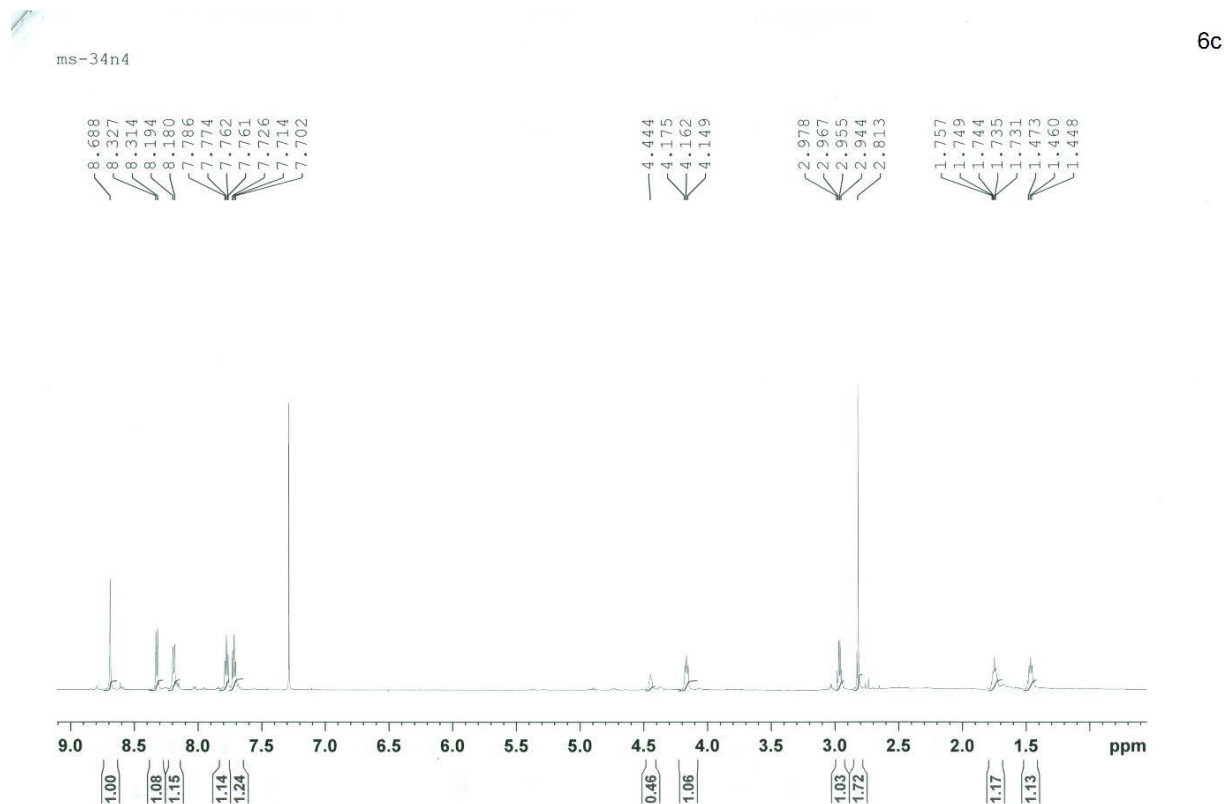

$^1\text{H}$  NMR of 14-methanesulfonylaminobutyldiquinothiazine (**6c**)



MJ6c

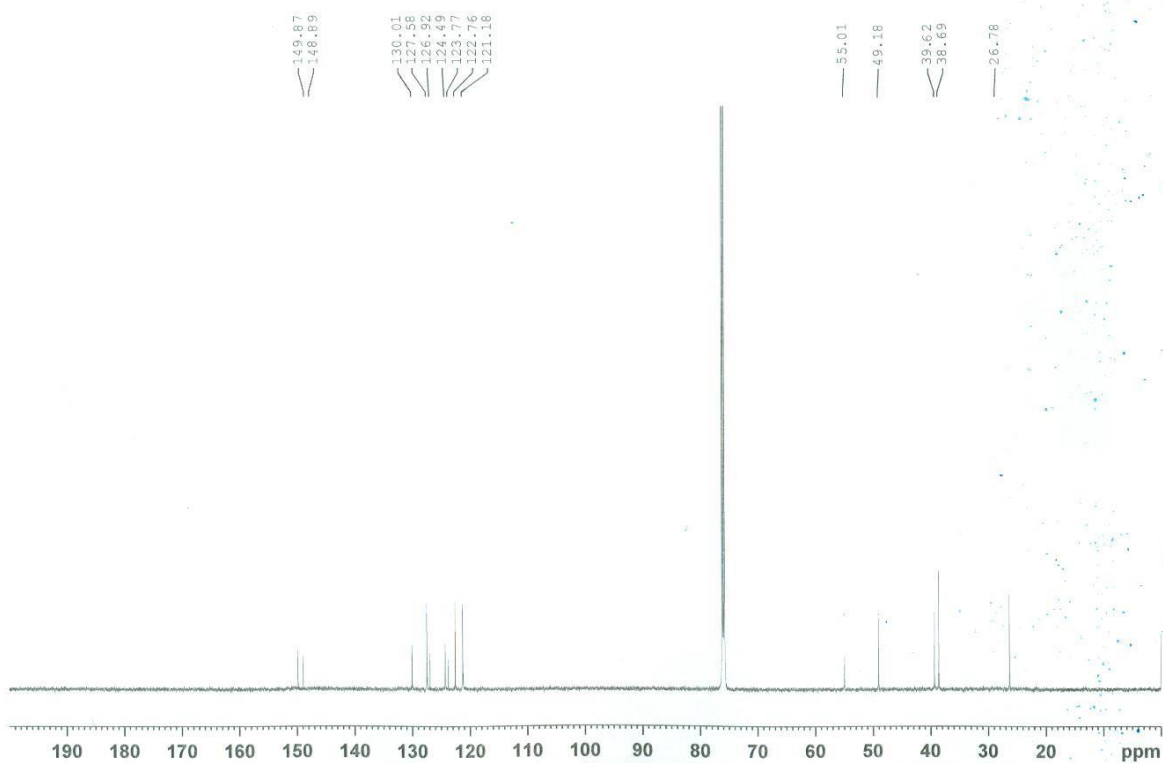

<sup>13</sup>C NMR of 14-methanesulfonylaminobutyldiquinethiazine (6c)

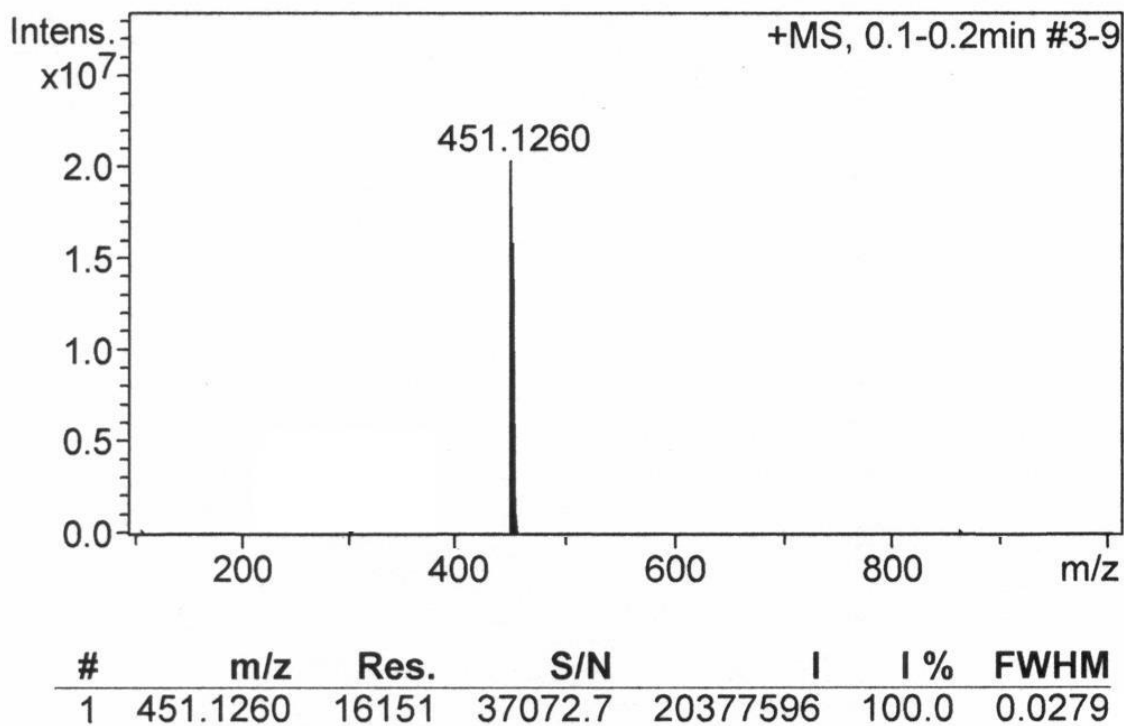

HR MS of 14-methanesulfonylaminobutyldiquinethiazine (6c) (calcd m/z = 451.1262)
